# Supplementary material for: Ketamine disrupts naturalistic coding of working memory in primate lateral prefrontal cortex networks
Source: PubMed Central journal article supplement (PMC8760073; doi:10.1038/s41380-021-01082-5), 2021-05-12
Supplement: 41380_2021_1082_MOESM2_ESM.pdf [file 41380_2021_1082_MOESM2_ESM.pdf]

### Supplementary Table 1. Statistical analysis

All post hoc testing used the Tukey-Kramer method, controlling for multiple comparisons. All statistical tests are two-sided unless otherwise specified.

| Figure                                                                | Sample Size<br>(numbers indicate sessions unless otherwise stated)      | Statistical Test | Values                                                                                                                                                                                                                                                                                                                                                                                                                                                                                                                                                                                                                                                      |
|-----------------------------------------------------------------------|-------------------------------------------------------------------------|------------------|-------------------------------------------------------------------------------------------------------------------------------------------------------------------------------------------------------------------------------------------------------------------------------------------------------------------------------------------------------------------------------------------------------------------------------------------------------------------------------------------------------------------------------------------------------------------------------------------------------------------------------------------------------------|
| Task performance (percent correct) compared to chance (11%)           | Ketamine-WM<br>18<br><br>Saline-WM<br>7<br><br>Ketamine-Perception<br>4 | Binomial test    | <p><b>Pre-Injection:</b><br/>Ketamine-WM sessions<br/><math>p &lt; 0.001</math><br/>Saline-WM sessions<br/><math>p &lt; 0.001</math><br/>Ketamine-Perception sessions<br/><math>p &lt; 0.001</math></p> <p><b>Early Post-Injection:</b><br/>Ketamine-WM sessions<br/>13 sessions, <math>p &lt; 0.05</math><br/>Saline-WM sessions<br/><math>p &lt; 0.0001</math><br/>Ketamine-Perception sessions<br/><math>p &lt; 0.0001</math></p> <p><b>Late Post-Injection:</b><br/>Ketamine-WM sessions<br/><math>p &lt; 0.05</math><br/>Saline-WM sessions<br/>6 sessions, <math>p &lt; 0.05</math><br/>Ketamine-Perception sessions<br/><math>p &lt; 0.05</math></p> |
| <b>Fig. 1g</b><br>Task performance (percent correct) compared between | Ketamine-WM<br>18<br><br>Saline-WM<br>7                                 |                  | <p><b>Ketamine-WM:</b><br/>Pre-Injection, <math>mean=72</math>, <math>median=77</math><br/>Early Post-Injection, <math>mean=34</math>, <math>median=28</math><br/>Late Post-Injection, <math>mean=64</math>, <math>median=66</math></p> <p><b>Saline-WM:</b><br/>Pre-Injection, <math>mean=80</math>, <math>median=84</math><br/>Early Post-Injection, <math>mean=77</math>, <math>median=90</math></p>                                                                                                                                                                                                                                                     |



|                                                                                   |                                                                                                                                                                                                                                                                                                                                                             |                                                                                       |                                                                                                                                                                                                                                                                                                                                                                                                                                                                                                                                                                                                                                                                                                                                                                                                                                                                                                                                          |
|-----------------------------------------------------------------------------------|-------------------------------------------------------------------------------------------------------------------------------------------------------------------------------------------------------------------------------------------------------------------------------------------------------------------------------------------------------------|---------------------------------------------------------------------------------------|------------------------------------------------------------------------------------------------------------------------------------------------------------------------------------------------------------------------------------------------------------------------------------------------------------------------------------------------------------------------------------------------------------------------------------------------------------------------------------------------------------------------------------------------------------------------------------------------------------------------------------------------------------------------------------------------------------------------------------------------------------------------------------------------------------------------------------------------------------------------------------------------------------------------------------------|
|                                                                                   | <p>Saline-WM<br/>7<br/><i>n</i>=55</p> <p>Ketamine-Perception<br/>4<br/><i>n</i>=31</p>                                                                                                                                                                                                                                                                     |                                                                                       | <p><b>Saline-WM:</b><br/>Pre-Injection, <i>mean</i>=2.6, <i>median</i>=2.4<br/>Early Post-Injection, <i>mean</i>=2.7, <i>median</i>=2.5<br/>Late Post-Injection, <i>mean</i>=2.7, <i>median</i>=2.4</p> <p><i>F</i>=1.71, <i>p</i>=0.186, <i>df</i>=2,108</p> <p><b>Ketamine-Perception:</b><br/>Pre-Injection, <i>mean</i>=2.5, <i>median</i>=2.3<br/>Early Post-Injection, <i>mean</i>=2.5, <i>median</i>=2.5<br/>Late Post-Injection, <i>mean</i>=2.5, <i>median</i>=2.5</p> <p><i>F</i>=0.22, <i>p</i>=0.800, <i>df</i>=2,60</p>                                                                                                                                                                                                                                                                                                                                                                                                     |
| <p><b>Fig. 11</b><br/>Navigation in environment (difference in cells entered)</p> | <p>NHP T<br/>8<br/>Number of cells (25) *<br/>number of target locations with trials<br/>Early post injection – pre-injection<br/>Ketamine, <i>n</i>=154<br/>Saline, <i>n</i>=161<br/>Late post-injection – pre-injection<br/>Ketamine, <i>n</i>=124<br/>Saline, <i>n</i>=125<br/>Early post-injection – late post-injection<br/>Ketamine, <i>n</i>=159</p> | <p>Two-way analysis of variance with interaction effect with post hoc comparisons</p> | <p><b>NHP T:</b><br/><b>Ketamine</b><br/>Early Post-Injection – Pre-Injection<br/><i>mean</i>=6.9, <i>median</i>=4.2<br/>Late Post-Injection – Pre-Injection<br/><i>mean</i>=3.3, <i>median</i>=0.9<br/>Early Post-Injection – Late Post-Injection<br/><i>mean</i>=6.6, <i>median</i>=2.9</p> <p><b>Saline</b><br/>Early Post-Injection – Pre-Injection<br/><i>mean</i>=3.2, <i>median</i>=0<br/>Late Post-Injection – Pre-Injection<br/><i>mean</i>=4.8, <i>median</i>=0<br/>Early Post-Injection – Late Post-Injection<br/><i>mean</i>=2.5, <i>median</i>=0</p> <p><b>Ketamine and Saline Comparison</b><br/>Epoch, <i>F</i>=0.97, <i>p</i>=0.380, <i>df</i>=2,832<br/>Drug, <i>F</i>=12.1, <i>p</i>=0.0005, <i>df</i>=1,832<br/>Interaction, <i>F</i>=8.73, <i>p</i>=0.0002, <i>df</i>=2,832</p> <p>Post Hoc<br/>Early Post-Injection, Pre-Injection<br/><i>p</i>=0.002<br/>Late Post-Injection, Pre-Injection<br/><i>p</i>=0.717</p> |

|  |                                                                                                                                                                                                                                                                                                                                                                                                                                                                                                                                                                                                                                                    |  |                                                                                                                                                                                                                                                                                                                                                                                                                                                                                                                                                                                                                                                                                                                                                                                                                                                                                                                                                                                                                                                                                                                                                                                                                                                                                                                    |
|--|----------------------------------------------------------------------------------------------------------------------------------------------------------------------------------------------------------------------------------------------------------------------------------------------------------------------------------------------------------------------------------------------------------------------------------------------------------------------------------------------------------------------------------------------------------------------------------------------------------------------------------------------------|--|--------------------------------------------------------------------------------------------------------------------------------------------------------------------------------------------------------------------------------------------------------------------------------------------------------------------------------------------------------------------------------------------------------------------------------------------------------------------------------------------------------------------------------------------------------------------------------------------------------------------------------------------------------------------------------------------------------------------------------------------------------------------------------------------------------------------------------------------------------------------------------------------------------------------------------------------------------------------------------------------------------------------------------------------------------------------------------------------------------------------------------------------------------------------------------------------------------------------------------------------------------------------------------------------------------------------|
|  | <p>Saline,<br/><i>n</i>=115</p> <p>NHP B<br/>9<br/>Number of<br/>cells (25) *<br/>number of<br/>target<br/>locations<br/>with trials<br/>Early post<br/>injection –<br/>pre-injection<br/>Ketamine,<br/><i>n</i>=162<br/>Saline,<br/><i>n</i>=158<br/>Late post-<br/>injection –<br/>pre-injection<br/>Ketamine,<br/><i>n</i>=163<br/>Saline,<br/><i>n</i>=157<br/>Early post-<br/>injection –<br/>late post-<br/>injection<br/>Ketamine,<br/><i>n</i>=134<br/>Saline,<br/><i>n</i>=145</p> <p>Ketamine-<br/>Perception<br/>4<br/>Early post<br/>injection –<br/>pre-injection<br/>Perception,<br/><i>n</i>=197<br/>Late post-<br/>injection –</p> |  | <p>Early Post-Injection, Late Post-Injection<br/><i>p</i>=0.001</p> <p><b>NHP B:</b><br/><b>Ketamine</b><br/>Early Post-Injection – Pre-Injection<br/><i>mean</i>=4.6, <i>median</i>=2.1<br/>Late Post-Injection – Pre-Injection<br/><i>mean</i>=3.6, <i>median</i>=1.8<br/>Early Post-Injection – Late Post-Injection<br/><i>mean</i>=4.1, <i>median</i>=2.3</p> <p><b>Saline</b><br/>Early Post-Injection – Pre-Injection<br/><i>mean</i>=2.6, <i>median</i>=1.2<br/>Late Post-Injection – Pre-Injection<br/><i>mean</i>=3.4, <i>median</i>=1.4,<br/>Early Post-Injection – Late Post-Injection<br/><i>mean</i>=2.4, <i>median</i>=0.8</p> <p><b>Ketamine and Saline Comparison</b><br/>Epoch, <i>F</i>=0.51, <i>p</i>=0.604, <i>df</i>=2,913<br/>Drug, <i>F</i>=15.16, <i>p</i>=0.0001, <i>df</i>=1,913<br/>Interaction, <i>F</i>=3.4, <i>p</i>=0.034, <i>df</i>=2,913</p> <p>Post Hoc<br/>Early Post-Injection, Pre-Injection<br/><i>p</i>=0.004<br/>Late Post-Injection, Pre-Injection<br/><i>p</i>=1<br/>Early Post-Injection, Late Post-Injection<br/><i>p</i>=0.044</p> <p><b>Perception</b><br/>Early Post-Injection – Pre-Injection<br/><i>mean</i>=1.8, <i>median</i>=0<br/>Late Post-Injection – Pre-Injection<br/><i>mean</i>=2.2, <i>median</i>=0<br/>Early Post-Injection – Late Post-Injection</p> |
|--|----------------------------------------------------------------------------------------------------------------------------------------------------------------------------------------------------------------------------------------------------------------------------------------------------------------------------------------------------------------------------------------------------------------------------------------------------------------------------------------------------------------------------------------------------------------------------------------------------------------------------------------------------|--|--------------------------------------------------------------------------------------------------------------------------------------------------------------------------------------------------------------------------------------------------------------------------------------------------------------------------------------------------------------------------------------------------------------------------------------------------------------------------------------------------------------------------------------------------------------------------------------------------------------------------------------------------------------------------------------------------------------------------------------------------------------------------------------------------------------------------------------------------------------------------------------------------------------------------------------------------------------------------------------------------------------------------------------------------------------------------------------------------------------------------------------------------------------------------------------------------------------------------------------------------------------------------------------------------------------------|

|                                                                                                     |                                                                                                                           |                                                                                                   |                                                                                                                                                                                                                                                                                                                                                                                                                                                                                                                                                |
|-----------------------------------------------------------------------------------------------------|---------------------------------------------------------------------------------------------------------------------------|---------------------------------------------------------------------------------------------------|------------------------------------------------------------------------------------------------------------------------------------------------------------------------------------------------------------------------------------------------------------------------------------------------------------------------------------------------------------------------------------------------------------------------------------------------------------------------------------------------------------------------------------------------|
|                                                                                                     | pre-injection Perception, $n=194$<br>Early post-injection – late post-injection Perception, $n=203$<br><br>Ketamine-WM 17 |                                                                                                   | $mean=2.0, median=0$<br><br><b>Ketamine-WM and Ketamine-Perception Comparison</b><br><br>Epoch, $F=3.09, p=0.046, df=2,1022$<br>Drug, $F=25.6, p=0, df=1,1022$<br>Interaction, $F=5.26, p=0.005, df=2,1022$<br><br>Post Hoc<br>Early Post-Injection, Pre-Injection $p=0$<br>Late Post-Injection, Pre-Injection $p=0.999$<br>Early Post-Injection, Late Post-Injection $p=0.007$                                                                                                                                                                |
| <b>Fig. 2c</b><br>Proportion of tuned units ketamine-WM sessions compared between injection periods | 17 $n=51$ , selectivity proportions combined (17 per epoch)                                                               | Analysis of variance with post hoc testing<br><br><br><br><br><br><br><br><br><br>Chi-Square Test | Pre-Injection, $mean=11.36, median=10.93$<br>Early Post-Injection, $mean=6.23, median=5.20$<br>Late Post-Injection, $mean=9.62, median=7.79$<br><br>$F=8.73, p=0.0002, df=2,303$<br>Post Hoc<br>Pre-Injection, Early Post-Injection $p=0.0001$<br>Pre-Injection, Late Post-Injection $p=0.342$<br>Early Post-Injection, Late Post-Injection $p=0.018$<br><br>Pre-Injection- Early Post-Injection, $p=0, X^2=128.67$<br>Pre-Injection- Late Post-Injection, $p=0.97, X^2=0.002$<br>Early Post-Injection- Late Post-Injection, $p=0, X^2=126.52$ |
| <b>Fig. 2d</b><br>Proportion of tuned units saline-WM sessions compared between injection periods   | 7 $n=21$ , selectivity proportions combined (7 per epoch)                                                                 | One-way analysis of variance<br><br><br><br><br><br><br><br><br><br>Chi-Square Test               | Pre-Injection, $mean=11.7, median=13.5$<br>Early Post-Injection, $mean=10.04, median=10.26$<br>Late Post-Injection, $mean=8.04, median=8.39$<br><br>$F=1.93, p=0.1498, df=2,123$<br><br>Pre-Injection- Early Post-Injection, $p=0.231, X^2=1.44$                                                                                                                                                                                                                                                                                               |

|                                                                                        |       |                                                                   | Pre-Injection- Late Post-Injection, $p=5.26e-07$ , $X^2=25.17$<br>Early Post-Injection- Late Post-Injection, $p=1.3e-04$ , $X^2=14.65$                                                                                                                                                                                                                                                                                                                                                                                                                                                                                                                                                                                                                                                                                                                                                                                                                                                                                                                                                                                                                                                                                                                                                                                                                                                                                                                                                                                                                                                                                                                                                                                                                                                                                                                                                                                                                                                                                                                                                                                                                                                                                                                                     |              |            |     |               |         |         |   |       |      |       |            |            |   |       |      |       |            |            |   |       |      |       |            |            |   |       |      |       |            |            |   |       |      |       |            |            |   |       |      |       |            |            |   |       |      |       |            |            |   |       |      |       |            |            |   |       |      |       |            |            |    |       |      |       |            |            |    |       |      |       |            |            |    |       |      |       |            |            |    |       |      |       |            |            |    |       |     |       |            |            |    |       |      |       |            |            |    |       |      |       |            |            |              |     |     |               |        |         |   |       |       |       |            |            |
|----------------------------------------------------------------------------------------|-------|-------------------------------------------------------------------|----------------------------------------------------------------------------------------------------------------------------------------------------------------------------------------------------------------------------------------------------------------------------------------------------------------------------------------------------------------------------------------------------------------------------------------------------------------------------------------------------------------------------------------------------------------------------------------------------------------------------------------------------------------------------------------------------------------------------------------------------------------------------------------------------------------------------------------------------------------------------------------------------------------------------------------------------------------------------------------------------------------------------------------------------------------------------------------------------------------------------------------------------------------------------------------------------------------------------------------------------------------------------------------------------------------------------------------------------------------------------------------------------------------------------------------------------------------------------------------------------------------------------------------------------------------------------------------------------------------------------------------------------------------------------------------------------------------------------------------------------------------------------------------------------------------------------------------------------------------------------------------------------------------------------------------------------------------------------------------------------------------------------------------------------------------------------------------------------------------------------------------------------------------------------------------------------------------------------------------------------------------------------|--------------|------------|-----|---------------|---------|---------|---|-------|------|-------|------------|------------|---|-------|------|-------|------------|------------|---|-------|------|-------|------------|------------|---|-------|------|-------|------------|------------|---|-------|------|-------|------------|------------|---|-------|------|-------|------------|------------|---|-------|------|-------|------------|------------|---|-------|------|-------|------------|------------|---|-------|------|-------|------------|------------|----|-------|------|-------|------------|------------|----|-------|------|-------|------------|------------|----|-------|------|-------|------------|------------|----|-------|------|-------|------------|------------|----|-------|-----|-------|------------|------------|----|-------|------|-------|------------|------------|----|-------|------|-------|------------|------------|--------------|-----|-----|---------------|--------|---------|---|-------|-------|-------|------------|------------|
| <b>Fig. 2f</b><br>Change in slope magnitude between injection periods                  | 17    | Kruskal-Wallis one-way analysis of variance with post hoc testing | <p><b>Ketamine</b><br/>Pre-Injection, <math>mean=-0.411</math>, <math>median=-0.413</math><br/>Early Post-Injection, <math>mean=-0.286</math>, <math>median=-0.298</math><br/>Late Post-Injection, <math>mean=-0.315</math>, <math>median=-0.306</math><br/><math>H=13.48</math>, <math>p=0.0012</math>, <math>df=2,48</math></p> <p>Post Hoc<br/>Pre-Injection, Early Post-Injection, <math>p=0.001</math><br/>Pre-Injection, Late Post-Injection, <math>p=0.017</math><br/>Early Post-Injection, Late Post-Injection, <math>p=0.741</math></p> <p><b>Saline</b><br/><math>H=5.7</math>, <math>p=0.058</math>, <math>df=2,18</math></p> <p>Post Hoc<br/>Pre-Injection, Early Post-Injection, <math>p=0.097</math><br/>Pre-Injection, Late Post-Injection, <math>p=0.097</math><br/>Early Post-Injection, Late Post-Injection, <math>p=1</math></p>                                                                                                                                                                                                                                                                                                                                                                                                                                                                                                                                                                                                                                                                                                                                                                                                                                                                                                                                                                                                                                                                                                                                                                                                                                                                                                                                                                                                                        |              |            |     |               |         |         |   |       |      |       |            |            |   |       |      |       |            |            |   |       |      |       |            |            |   |       |      |       |            |            |   |       |      |       |            |            |   |       |      |       |            |            |   |       |      |       |            |            |   |       |      |       |            |            |   |       |      |       |            |            |    |       |      |       |            |            |    |       |      |       |            |            |    |       |      |       |            |            |    |       |      |       |            |            |    |       |     |       |            |            |    |       |      |       |            |            |    |       |      |       |            |            |              |     |     |               |        |         |   |       |       |       |            |            |
| <b>Fig. 3a</b><br>SVM decoding accuracy ketamine-WM compared between injection periods | 16    | Kruskal-Wallis one-way analysis of variance with post hoc testing | <p><b>Cue: <math>df=2</math></b></p> <table border="1"> <thead> <tr> <th># of Neurons</th> <th><math>p</math></th> <th><math>H</math></th> <th>pre-post, <math>p</math></th> <th>CI- pre</th> <th>CI-post</th> </tr> </thead> <tbody> <tr><td>1</td><td>0.013</td><td>8.76</td><td>0.012</td><td>53.4, 59.5</td><td>46.7, 53.2</td></tr> <tr><td>2</td><td>0.008</td><td>9.74</td><td>0.007</td><td>64.1, 75.9</td><td>52.2, 62.7</td></tr> <tr><td>3</td><td>0.008</td><td>9.61</td><td>0.008</td><td>68.0, 80.6</td><td>55.5, 66.9</td></tr> <tr><td>4</td><td>0.015</td><td>8.37</td><td>0.016</td><td>70.1, 83.3</td><td>57.9, 70.6</td></tr> <tr><td>5</td><td>0.016</td><td>8.25</td><td>0.018</td><td>72.0, 85.3</td><td>59.2, 72.6</td></tr> <tr><td>6</td><td>0.024</td><td>7.42</td><td>0.023</td><td>73.1, 86.9</td><td>60.3, 74.0</td></tr> <tr><td>7</td><td>0.046</td><td>6.15</td><td>0.039</td><td>73.1, 87.5</td><td>61.4, 75.4</td></tr> <tr><td>8</td><td>0.050</td><td>5.99</td><td>0.042</td><td>73.6, 88.0</td><td>62.0, 76.3</td></tr> <tr><td>9</td><td>0.052</td><td>5.91</td><td>0.046</td><td>73.8, 88.8</td><td>62.7, 77.2</td></tr> <tr><td>10</td><td>0.049</td><td>6.03</td><td>0.043</td><td>74.1, 89.5</td><td>63.0, 77.6</td></tr> <tr><td>11</td><td>0.069</td><td>5.36</td><td>0.062</td><td>74.9, 89.9</td><td>63.3, 78.0</td></tr> <tr><td>12</td><td>0.075</td><td>5.17</td><td>0.067</td><td>74.5, 90.1</td><td>63.4, 78.4</td></tr> <tr><td>13</td><td>0.069</td><td>5.36</td><td>0.062</td><td>74.7, 90.5</td><td>63.6, 78.6</td></tr> <tr><td>14</td><td>0.067</td><td>5.4</td><td>0.060</td><td>74.6, 90.8</td><td>63.7, 78.7</td></tr> <tr><td>15</td><td>0.108</td><td>4.45</td><td>0.099</td><td>74.2, 90.6</td><td>63.8, 78.9</td></tr> <tr><td>16</td><td>0.076</td><td>5.15</td><td>0.072</td><td>75.1, 91.1</td><td>64.0, 79.0</td></tr> </tbody> </table> <p><b>Delay: <math>df=2</math></b></p> <table border="1"> <thead> <tr> <th># of Neurons</th> <th><math>p</math></th> <th><math>H</math></th> <th>pre-post, <math>p</math></th> <th>CI-pre</th> <th>CI-post</th> </tr> </thead> <tbody> <tr><td>1</td><td>0.002</td><td>12.78</td><td>0.002</td><td>54.7, 60.2</td><td>45.6, 51.4</td></tr> </tbody> </table> | # of Neurons | $p$        | $H$ | pre-post, $p$ | CI- pre | CI-post | 1 | 0.013 | 8.76 | 0.012 | 53.4, 59.5 | 46.7, 53.2 | 2 | 0.008 | 9.74 | 0.007 | 64.1, 75.9 | 52.2, 62.7 | 3 | 0.008 | 9.61 | 0.008 | 68.0, 80.6 | 55.5, 66.9 | 4 | 0.015 | 8.37 | 0.016 | 70.1, 83.3 | 57.9, 70.6 | 5 | 0.016 | 8.25 | 0.018 | 72.0, 85.3 | 59.2, 72.6 | 6 | 0.024 | 7.42 | 0.023 | 73.1, 86.9 | 60.3, 74.0 | 7 | 0.046 | 6.15 | 0.039 | 73.1, 87.5 | 61.4, 75.4 | 8 | 0.050 | 5.99 | 0.042 | 73.6, 88.0 | 62.0, 76.3 | 9 | 0.052 | 5.91 | 0.046 | 73.8, 88.8 | 62.7, 77.2 | 10 | 0.049 | 6.03 | 0.043 | 74.1, 89.5 | 63.0, 77.6 | 11 | 0.069 | 5.36 | 0.062 | 74.9, 89.9 | 63.3, 78.0 | 12 | 0.075 | 5.17 | 0.067 | 74.5, 90.1 | 63.4, 78.4 | 13 | 0.069 | 5.36 | 0.062 | 74.7, 90.5 | 63.6, 78.6 | 14 | 0.067 | 5.4 | 0.060 | 74.6, 90.8 | 63.7, 78.7 | 15 | 0.108 | 4.45 | 0.099 | 74.2, 90.6 | 63.8, 78.9 | 16 | 0.076 | 5.15 | 0.072 | 75.1, 91.1 | 64.0, 79.0 | # of Neurons | $p$ | $H$ | pre-post, $p$ | CI-pre | CI-post | 1 | 0.002 | 12.78 | 0.002 | 54.7, 60.2 | 45.6, 51.4 |
| # of Neurons                                                                           | $p$   | $H$                                                               | pre-post, $p$                                                                                                                                                                                                                                                                                                                                                                                                                                                                                                                                                                                                                                                                                                                                                                                                                                                                                                                                                                                                                                                                                                                                                                                                                                                                                                                                                                                                                                                                                                                                                                                                                                                                                                                                                                                                                                                                                                                                                                                                                                                                                                                                                                                                                                                              | CI- pre      | CI-post    |     |               |         |         |   |       |      |       |            |            |   |       |      |       |            |            |   |       |      |       |            |            |   |       |      |       |            |            |   |       |      |       |            |            |   |       |      |       |            |            |   |       |      |       |            |            |   |       |      |       |            |            |   |       |      |       |            |            |    |       |      |       |            |            |    |       |      |       |            |            |    |       |      |       |            |            |    |       |      |       |            |            |    |       |     |       |            |            |    |       |      |       |            |            |    |       |      |       |            |            |              |     |     |               |        |         |   |       |       |       |            |            |
| 1                                                                                      | 0.013 | 8.76                                                              | 0.012                                                                                                                                                                                                                                                                                                                                                                                                                                                                                                                                                                                                                                                                                                                                                                                                                                                                                                                                                                                                                                                                                                                                                                                                                                                                                                                                                                                                                                                                                                                                                                                                                                                                                                                                                                                                                                                                                                                                                                                                                                                                                                                                                                                                                                                                      | 53.4, 59.5   | 46.7, 53.2 |     |               |         |         |   |       |      |       |            |            |   |       |      |       |            |            |   |       |      |       |            |            |   |       |      |       |            |            |   |       |      |       |            |            |   |       |      |       |            |            |   |       |      |       |            |            |   |       |      |       |            |            |   |       |      |       |            |            |    |       |      |       |            |            |    |       |      |       |            |            |    |       |      |       |            |            |    |       |      |       |            |            |    |       |     |       |            |            |    |       |      |       |            |            |    |       |      |       |            |            |              |     |     |               |        |         |   |       |       |       |            |            |
| 2                                                                                      | 0.008 | 9.74                                                              | 0.007                                                                                                                                                                                                                                                                                                                                                                                                                                                                                                                                                                                                                                                                                                                                                                                                                                                                                                                                                                                                                                                                                                                                                                                                                                                                                                                                                                                                                                                                                                                                                                                                                                                                                                                                                                                                                                                                                                                                                                                                                                                                                                                                                                                                                                                                      | 64.1, 75.9   | 52.2, 62.7 |     |               |         |         |   |       |      |       |            |            |   |       |      |       |            |            |   |       |      |       |            |            |   |       |      |       |            |            |   |       |      |       |            |            |   |       |      |       |            |            |   |       |      |       |            |            |   |       |      |       |            |            |   |       |      |       |            |            |    |       |      |       |            |            |    |       |      |       |            |            |    |       |      |       |            |            |    |       |      |       |            |            |    |       |     |       |            |            |    |       |      |       |            |            |    |       |      |       |            |            |              |     |     |               |        |         |   |       |       |       |            |            |
| 3                                                                                      | 0.008 | 9.61                                                              | 0.008                                                                                                                                                                                                                                                                                                                                                                                                                                                                                                                                                                                                                                                                                                                                                                                                                                                                                                                                                                                                                                                                                                                                                                                                                                                                                                                                                                                                                                                                                                                                                                                                                                                                                                                                                                                                                                                                                                                                                                                                                                                                                                                                                                                                                                                                      | 68.0, 80.6   | 55.5, 66.9 |     |               |         |         |   |       |      |       |            |            |   |       |      |       |            |            |   |       |      |       |            |            |   |       |      |       |            |            |   |       |      |       |            |            |   |       |      |       |            |            |   |       |      |       |            |            |   |       |      |       |            |            |   |       |      |       |            |            |    |       |      |       |            |            |    |       |      |       |            |            |    |       |      |       |            |            |    |       |      |       |            |            |    |       |     |       |            |            |    |       |      |       |            |            |    |       |      |       |            |            |              |     |     |               |        |         |   |       |       |       |            |            |
| 4                                                                                      | 0.015 | 8.37                                                              | 0.016                                                                                                                                                                                                                                                                                                                                                                                                                                                                                                                                                                                                                                                                                                                                                                                                                                                                                                                                                                                                                                                                                                                                                                                                                                                                                                                                                                                                                                                                                                                                                                                                                                                                                                                                                                                                                                                                                                                                                                                                                                                                                                                                                                                                                                                                      | 70.1, 83.3   | 57.9, 70.6 |     |               |         |         |   |       |      |       |            |            |   |       |      |       |            |            |   |       |      |       |            |            |   |       |      |       |            |            |   |       |      |       |            |            |   |       |      |       |            |            |   |       |      |       |            |            |   |       |      |       |            |            |   |       |      |       |            |            |    |       |      |       |            |            |    |       |      |       |            |            |    |       |      |       |            |            |    |       |      |       |            |            |    |       |     |       |            |            |    |       |      |       |            |            |    |       |      |       |            |            |              |     |     |               |        |         |   |       |       |       |            |            |
| 5                                                                                      | 0.016 | 8.25                                                              | 0.018                                                                                                                                                                                                                                                                                                                                                                                                                                                                                                                                                                                                                                                                                                                                                                                                                                                                                                                                                                                                                                                                                                                                                                                                                                                                                                                                                                                                                                                                                                                                                                                                                                                                                                                                                                                                                                                                                                                                                                                                                                                                                                                                                                                                                                                                      | 72.0, 85.3   | 59.2, 72.6 |     |               |         |         |   |       |      |       |            |            |   |       |      |       |            |            |   |       |      |       |            |            |   |       |      |       |            |            |   |       |      |       |            |            |   |       |      |       |            |            |   |       |      |       |            |            |   |       |      |       |            |            |   |       |      |       |            |            |    |       |      |       |            |            |    |       |      |       |            |            |    |       |      |       |            |            |    |       |      |       |            |            |    |       |     |       |            |            |    |       |      |       |            |            |    |       |      |       |            |            |              |     |     |               |        |         |   |       |       |       |            |            |
| 6                                                                                      | 0.024 | 7.42                                                              | 0.023                                                                                                                                                                                                                                                                                                                                                                                                                                                                                                                                                                                                                                                                                                                                                                                                                                                                                                                                                                                                                                                                                                                                                                                                                                                                                                                                                                                                                                                                                                                                                                                                                                                                                                                                                                                                                                                                                                                                                                                                                                                                                                                                                                                                                                                                      | 73.1, 86.9   | 60.3, 74.0 |     |               |         |         |   |       |      |       |            |            |   |       |      |       |            |            |   |       |      |       |            |            |   |       |      |       |            |            |   |       |      |       |            |            |   |       |      |       |            |            |   |       |      |       |            |            |   |       |      |       |            |            |   |       |      |       |            |            |    |       |      |       |            |            |    |       |      |       |            |            |    |       |      |       |            |            |    |       |      |       |            |            |    |       |     |       |            |            |    |       |      |       |            |            |    |       |      |       |            |            |              |     |     |               |        |         |   |       |       |       |            |            |
| 7                                                                                      | 0.046 | 6.15                                                              | 0.039                                                                                                                                                                                                                                                                                                                                                                                                                                                                                                                                                                                                                                                                                                                                                                                                                                                                                                                                                                                                                                                                                                                                                                                                                                                                                                                                                                                                                                                                                                                                                                                                                                                                                                                                                                                                                                                                                                                                                                                                                                                                                                                                                                                                                                                                      | 73.1, 87.5   | 61.4, 75.4 |     |               |         |         |   |       |      |       |            |            |   |       |      |       |            |            |   |       |      |       |            |            |   |       |      |       |            |            |   |       |      |       |            |            |   |       |      |       |            |            |   |       |      |       |            |            |   |       |      |       |            |            |   |       |      |       |            |            |    |       |      |       |            |            |    |       |      |       |            |            |    |       |      |       |            |            |    |       |      |       |            |            |    |       |     |       |            |            |    |       |      |       |            |            |    |       |      |       |            |            |              |     |     |               |        |         |   |       |       |       |            |            |
| 8                                                                                      | 0.050 | 5.99                                                              | 0.042                                                                                                                                                                                                                                                                                                                                                                                                                                                                                                                                                                                                                                                                                                                                                                                                                                                                                                                                                                                                                                                                                                                                                                                                                                                                                                                                                                                                                                                                                                                                                                                                                                                                                                                                                                                                                                                                                                                                                                                                                                                                                                                                                                                                                                                                      | 73.6, 88.0   | 62.0, 76.3 |     |               |         |         |   |       |      |       |            |            |   |       |      |       |            |            |   |       |      |       |            |            |   |       |      |       |            |            |   |       |      |       |            |            |   |       |      |       |            |            |   |       |      |       |            |            |   |       |      |       |            |            |   |       |      |       |            |            |    |       |      |       |            |            |    |       |      |       |            |            |    |       |      |       |            |            |    |       |      |       |            |            |    |       |     |       |            |            |    |       |      |       |            |            |    |       |      |       |            |            |              |     |     |               |        |         |   |       |       |       |            |            |
| 9                                                                                      | 0.052 | 5.91                                                              | 0.046                                                                                                                                                                                                                                                                                                                                                                                                                                                                                                                                                                                                                                                                                                                                                                                                                                                                                                                                                                                                                                                                                                                                                                                                                                                                                                                                                                                                                                                                                                                                                                                                                                                                                                                                                                                                                                                                                                                                                                                                                                                                                                                                                                                                                                                                      | 73.8, 88.8   | 62.7, 77.2 |     |               |         |         |   |       |      |       |            |            |   |       |      |       |            |            |   |       |      |       |            |            |   |       |      |       |            |            |   |       |      |       |            |            |   |       |      |       |            |            |   |       |      |       |            |            |   |       |      |       |            |            |   |       |      |       |            |            |    |       |      |       |            |            |    |       |      |       |            |            |    |       |      |       |            |            |    |       |      |       |            |            |    |       |     |       |            |            |    |       |      |       |            |            |    |       |      |       |            |            |              |     |     |               |        |         |   |       |       |       |            |            |
| 10                                                                                     | 0.049 | 6.03                                                              | 0.043                                                                                                                                                                                                                                                                                                                                                                                                                                                                                                                                                                                                                                                                                                                                                                                                                                                                                                                                                                                                                                                                                                                                                                                                                                                                                                                                                                                                                                                                                                                                                                                                                                                                                                                                                                                                                                                                                                                                                                                                                                                                                                                                                                                                                                                                      | 74.1, 89.5   | 63.0, 77.6 |     |               |         |         |   |       |      |       |            |            |   |       |      |       |            |            |   |       |      |       |            |            |   |       |      |       |            |            |   |       |      |       |            |            |   |       |      |       |            |            |   |       |      |       |            |            |   |       |      |       |            |            |   |       |      |       |            |            |    |       |      |       |            |            |    |       |      |       |            |            |    |       |      |       |            |            |    |       |      |       |            |            |    |       |     |       |            |            |    |       |      |       |            |            |    |       |      |       |            |            |              |     |     |               |        |         |   |       |       |       |            |            |
| 11                                                                                     | 0.069 | 5.36                                                              | 0.062                                                                                                                                                                                                                                                                                                                                                                                                                                                                                                                                                                                                                                                                                                                                                                                                                                                                                                                                                                                                                                                                                                                                                                                                                                                                                                                                                                                                                                                                                                                                                                                                                                                                                                                                                                                                                                                                                                                                                                                                                                                                                                                                                                                                                                                                      | 74.9, 89.9   | 63.3, 78.0 |     |               |         |         |   |       |      |       |            |            |   |       |      |       |            |            |   |       |      |       |            |            |   |       |      |       |            |            |   |       |      |       |            |            |   |       |      |       |            |            |   |       |      |       |            |            |   |       |      |       |            |            |   |       |      |       |            |            |    |       |      |       |            |            |    |       |      |       |            |            |    |       |      |       |            |            |    |       |      |       |            |            |    |       |     |       |            |            |    |       |      |       |            |            |    |       |      |       |            |            |              |     |     |               |        |         |   |       |       |       |            |            |
| 12                                                                                     | 0.075 | 5.17                                                              | 0.067                                                                                                                                                                                                                                                                                                                                                                                                                                                                                                                                                                                                                                                                                                                                                                                                                                                                                                                                                                                                                                                                                                                                                                                                                                                                                                                                                                                                                                                                                                                                                                                                                                                                                                                                                                                                                                                                                                                                                                                                                                                                                                                                                                                                                                                                      | 74.5, 90.1   | 63.4, 78.4 |     |               |         |         |   |       |      |       |            |            |   |       |      |       |            |            |   |       |      |       |            |            |   |       |      |       |            |            |   |       |      |       |            |            |   |       |      |       |            |            |   |       |      |       |            |            |   |       |      |       |            |            |   |       |      |       |            |            |    |       |      |       |            |            |    |       |      |       |            |            |    |       |      |       |            |            |    |       |      |       |            |            |    |       |     |       |            |            |    |       |      |       |            |            |    |       |      |       |            |            |              |     |     |               |        |         |   |       |       |       |            |            |
| 13                                                                                     | 0.069 | 5.36                                                              | 0.062                                                                                                                                                                                                                                                                                                                                                                                                                                                                                                                                                                                                                                                                                                                                                                                                                                                                                                                                                                                                                                                                                                                                                                                                                                                                                                                                                                                                                                                                                                                                                                                                                                                                                                                                                                                                                                                                                                                                                                                                                                                                                                                                                                                                                                                                      | 74.7, 90.5   | 63.6, 78.6 |     |               |         |         |   |       |      |       |            |            |   |       |      |       |            |            |   |       |      |       |            |            |   |       |      |       |            |            |   |       |      |       |            |            |   |       |      |       |            |            |   |       |      |       |            |            |   |       |      |       |            |            |   |       |      |       |            |            |    |       |      |       |            |            |    |       |      |       |            |            |    |       |      |       |            |            |    |       |      |       |            |            |    |       |     |       |            |            |    |       |      |       |            |            |    |       |      |       |            |            |              |     |     |               |        |         |   |       |       |       |            |            |
| 14                                                                                     | 0.067 | 5.4                                                               | 0.060                                                                                                                                                                                                                                                                                                                                                                                                                                                                                                                                                                                                                                                                                                                                                                                                                                                                                                                                                                                                                                                                                                                                                                                                                                                                                                                                                                                                                                                                                                                                                                                                                                                                                                                                                                                                                                                                                                                                                                                                                                                                                                                                                                                                                                                                      | 74.6, 90.8   | 63.7, 78.7 |     |               |         |         |   |       |      |       |            |            |   |       |      |       |            |            |   |       |      |       |            |            |   |       |      |       |            |            |   |       |      |       |            |            |   |       |      |       |            |            |   |       |      |       |            |            |   |       |      |       |            |            |   |       |      |       |            |            |    |       |      |       |            |            |    |       |      |       |            |            |    |       |      |       |            |            |    |       |      |       |            |            |    |       |     |       |            |            |    |       |      |       |            |            |    |       |      |       |            |            |              |     |     |               |        |         |   |       |       |       |            |            |
| 15                                                                                     | 0.108 | 4.45                                                              | 0.099                                                                                                                                                                                                                                                                                                                                                                                                                                                                                                                                                                                                                                                                                                                                                                                                                                                                                                                                                                                                                                                                                                                                                                                                                                                                                                                                                                                                                                                                                                                                                                                                                                                                                                                                                                                                                                                                                                                                                                                                                                                                                                                                                                                                                                                                      | 74.2, 90.6   | 63.8, 78.9 |     |               |         |         |   |       |      |       |            |            |   |       |      |       |            |            |   |       |      |       |            |            |   |       |      |       |            |            |   |       |      |       |            |            |   |       |      |       |            |            |   |       |      |       |            |            |   |       |      |       |            |            |   |       |      |       |            |            |    |       |      |       |            |            |    |       |      |       |            |            |    |       |      |       |            |            |    |       |      |       |            |            |    |       |     |       |            |            |    |       |      |       |            |            |    |       |      |       |            |            |              |     |     |               |        |         |   |       |       |       |            |            |
| 16                                                                                     | 0.076 | 5.15                                                              | 0.072                                                                                                                                                                                                                                                                                                                                                                                                                                                                                                                                                                                                                                                                                                                                                                                                                                                                                                                                                                                                                                                                                                                                                                                                                                                                                                                                                                                                                                                                                                                                                                                                                                                                                                                                                                                                                                                                                                                                                                                                                                                                                                                                                                                                                                                                      | 75.1, 91.1   | 64.0, 79.0 |     |               |         |         |   |       |      |       |            |            |   |       |      |       |            |            |   |       |      |       |            |            |   |       |      |       |            |            |   |       |      |       |            |            |   |       |      |       |            |            |   |       |      |       |            |            |   |       |      |       |            |            |   |       |      |       |            |            |    |       |      |       |            |            |    |       |      |       |            |            |    |       |      |       |            |            |    |       |      |       |            |            |    |       |     |       |            |            |    |       |      |       |            |            |    |       |      |       |            |            |              |     |     |               |        |         |   |       |       |       |            |            |
| # of Neurons                                                                           | $p$   | $H$                                                               | pre-post, $p$                                                                                                                                                                                                                                                                                                                                                                                                                                                                                                                                                                                                                                                                                                                                                                                                                                                                                                                                                                                                                                                                                                                                                                                                                                                                                                                                                                                                                                                                                                                                                                                                                                                                                                                                                                                                                                                                                                                                                                                                                                                                                                                                                                                                                                                              | CI-pre       | CI-post    |     |               |         |         |   |       |      |       |            |            |   |       |      |       |            |            |   |       |      |       |            |            |   |       |      |       |            |            |   |       |      |       |            |            |   |       |      |       |            |            |   |       |      |       |            |            |   |       |      |       |            |            |   |       |      |       |            |            |    |       |      |       |            |            |    |       |      |       |            |            |    |       |      |       |            |            |    |       |      |       |            |            |    |       |     |       |            |            |    |       |      |       |            |            |    |       |      |       |            |            |              |     |     |               |        |         |   |       |       |       |            |            |
| 1                                                                                      | 0.002 | 12.78                                                             | 0.002                                                                                                                                                                                                                                                                                                                                                                                                                                                                                                                                                                                                                                                                                                                                                                                                                                                                                                                                                                                                                                                                                                                                                                                                                                                                                                                                                                                                                                                                                                                                                                                                                                                                                                                                                                                                                                                                                                                                                                                                                                                                                                                                                                                                                                                                      | 54.7, 60.2   | 45.6, 51.4 |     |               |         |         |   |       |      |       |            |            |   |       |      |       |            |            |   |       |      |       |            |            |   |       |      |       |            |            |   |       |      |       |            |            |   |       |      |       |            |            |   |       |      |       |            |            |   |       |      |       |            |            |   |       |      |       |            |            |    |       |      |       |            |            |    |       |      |       |            |            |    |       |      |       |            |            |    |       |      |       |            |            |    |       |     |       |            |            |    |       |      |       |            |            |    |       |      |       |            |            |              |     |     |               |        |         |   |       |       |       |            |            |

|  |  |  |                                    |       |       |               |            |            |
|--|--|--|------------------------------------|-------|-------|---------------|------------|------------|
|  |  |  | 2                                  | 0.004 | 10.86 | 0.006         | 66.9, 79.2 | 51.6, 62.4 |
|  |  |  | 3                                  | 0.008 | 9.79  | 0.011         | 70.5, 83.0 | 55.0, 67.3 |
|  |  |  | 4                                  | 0.009 | 9.43  | 0.016         | 73.1, 85.5 | 57.7, 70.1 |
|  |  |  | 5                                  | 0.013 | 8.63  | 0.023         | 74.0, 87.0 | 58.9, 71.7 |
|  |  |  | 6                                  | 0.006 | 10.21 | 0.013         | 75.5, 88.5 | 59.5, 72.4 |
|  |  |  | 7                                  | 0.004 | 10.91 | 0.012         | 76.4, 89.7 | 60.5, 73.4 |
|  |  |  | 8                                  | 0.006 | 10.21 | 0.018         | 76.9, 90.3 | 61.7, 74.5 |
|  |  |  | 9                                  | 0.006 | 10.34 | 0.017         | 77.5, 90.7 | 61.7, 75.1 |
|  |  |  | 10                                 | 0.004 | 11.06 | 0.010         | 78.5, 91.1 | 61.6, 75.5 |
|  |  |  | 11                                 | 0.002 | 12.71 | 0.006         | 79.7, 91.9 | 62.0, 75.9 |
|  |  |  | 12                                 | 0.003 | 11.35 | 0.012         | 79.2, 92.0 | 62.3, 76.3 |
|  |  |  | 13                                 | 0.004 | 11.08 | 0.015         | 79.4, 92.1 | 62.4, 76.6 |
|  |  |  | 14                                 | 0.004 | 11.07 | 0.013         | 79.1, 92.1 | 62.3, 76.6 |
|  |  |  | 15                                 | 0.004 | 11.07 | 0.014         | 79.2, 92.4 | 62.5, 77.0 |
|  |  |  | 16                                 | 0.004 | 11.26 | 0.015         | 79.4, 92.3 | 62.4, 77.1 |
|  |  |  | <b>Response: <math>df=2</math></b> |       |       |               |            |            |
|  |  |  | # of Neurons                       | $p$   | $H$   | pre-post, $p$ | $CI$ -pre  | $CI$ -post |
|  |  |  | 1                                  | 0.007 | 10.03 | 0.007         | 53.6, 60.7 | 46.6, 52.5 |
|  |  |  | 2                                  | 0.014 | 8.48  | 0.010         | 65.4, 79.5 | 53.1, 63.3 |
|  |  |  | 3                                  | 0.010 | 9.32  | 0.007         | 70.3, 84.1 | 55.4, 67.0 |
|  |  |  | 4                                  | 0.007 | 9.94  | 0.005         | 72.8, 86.3 | 56.8, 68.9 |
|  |  |  | 5                                  | 0.009 | 9.42  | 0.007         | 74.0, 87.8 | 58.0, 71.0 |
|  |  |  | 6                                  | 0.009 | 9.46  | 0.007         | 75.8, 88.6 | 58.5, 72.2 |
|  |  |  | 7                                  | 0.006 | 10.18 | 0.006         | 77.5, 89.5 | 59.1, 72.9 |
|  |  |  | 8                                  | 0.011 | 9.08  | 0.013         | 78.1, 89.9 | 60.0, 74.1 |
|  |  |  | 9                                  | 0.011 | 8.96  | 0.014         | 78.7, 90.6 | 60.5, 74.9 |
|  |  |  | 10                                 | 0.010 | 9.15  | 0.014         | 79.5, 90.8 | 61.0, 75.4 |
|  |  |  | 11                                 | 0.010 | 9.25  | 0.014         | 79.5, 91.1 | 61.4, 75.7 |

|                                                                                                                 |    |                                                                                    |                                                                                                                                                                                                                                                                                                                                                                                                                                                                                                                                                                                                                                                                                                                                                                                                                                                                                       |       |      |       |            |            |
|-----------------------------------------------------------------------------------------------------------------|----|------------------------------------------------------------------------------------|---------------------------------------------------------------------------------------------------------------------------------------------------------------------------------------------------------------------------------------------------------------------------------------------------------------------------------------------------------------------------------------------------------------------------------------------------------------------------------------------------------------------------------------------------------------------------------------------------------------------------------------------------------------------------------------------------------------------------------------------------------------------------------------------------------------------------------------------------------------------------------------|-------|------|-------|------------|------------|
|                                                                                                                 |    |                                                                                    | 12                                                                                                                                                                                                                                                                                                                                                                                                                                                                                                                                                                                                                                                                                                                                                                                                                                                                                    | 0.010 | 9.3  | 0.016 | 79.3, 91.3 | 61.7, 75.9 |
|                                                                                                                 |    |                                                                                    | 13                                                                                                                                                                                                                                                                                                                                                                                                                                                                                                                                                                                                                                                                                                                                                                                                                                                                                    | 0.013 | 8.68 | 0.020 | 78.8, 91.3 | 62.0, 75.9 |
|                                                                                                                 |    |                                                                                    | 14                                                                                                                                                                                                                                                                                                                                                                                                                                                                                                                                                                                                                                                                                                                                                                                                                                                                                    | 0.014 | 8.54 | 0.018 | 78.9, 91.3 | 61.9, 75.8 |
|                                                                                                                 |    |                                                                                    | 15                                                                                                                                                                                                                                                                                                                                                                                                                                                                                                                                                                                                                                                                                                                                                                                                                                                                                    | 0.013 | 8.75 | 0.017 | 78.9, 91.4 | 62.0, 76.0 |
|                                                                                                                 |    |                                                                                    | 16                                                                                                                                                                                                                                                                                                                                                                                                                                                                                                                                                                                                                                                                                                                                                                                                                                                                                    | 0.018 | 8    | 0.023 | 78.8, 91.6 | 62.1, 76.3 |
| <b>Fig. 3b</b><br>SVM<br>decoding<br>accuracy<br>saline-WM<br>compared<br>between<br>injection<br>periods       | 7  | Kruskal-<br>Wallis one-<br>way analysis<br>of variance                             | <p>Ensemble of 16 neurons:</p> <p><b>Cue:</b><br/>Pre-Injection, <i>mean</i>=82.6, <i>median</i>=89.7<br/>Early Post-Injection, <i>mean</i>=74.4, <i>median</i>=91.0<br/>Late Post-Injection, <i>mean</i>=76.0, <i>median</i>=88.6</p> <p><i>H</i>=0.54, <i>p</i>=0.763, <i>df</i>=2,18</p> <p><b>Delay:</b><br/>Pre-Injection, <i>mean</i>=83.6, <i>median</i>=92.5<br/>Early Post-Injection, <i>mean</i>=77.3, <i>median</i>=90.9<br/>Late Post-Injection, <i>mean</i>=73.6, <i>median</i>=89.2</p> <p><i>H</i>=1.12, <i>p</i>=0.571, <i>df</i>=2,18</p> <p><b>Response:</b><br/>Pre-Injection, <i>mean</i>=83.9, <i>median</i>=94.1<br/>Early Post-Injection, <i>mean</i>=79.3, <i>median</i>=91.1<br/>Late Post-Injection, <i>mean</i>=76.9, <i>median</i>=85.9</p> <p><i>H</i>=1.36, <i>p</i>=0.507, <i>df</i>=2,18</p> <p>All other neuron ensemble sizes, <i>p</i>&gt;0.05</p> |       |      |       |            |            |
| <b>Fig. 3c</b><br>LDA<br>decoding<br>accuracy<br>ketamine-<br>WM<br>compared<br>between<br>injection<br>periods | 17 | Kruskal-<br>Wallis one-<br>way analysis<br>of variance<br>with post hoc<br>testing | <p>Pre-Injection, <i>mean</i>=78.0, <i>median</i>=78.9<br/>Early Post-Injection, <i>mean</i>=66.0, <i>median</i>=63.6<br/>Late Post-Injection, <i>mean</i>=69.0, <i>median</i>=64.7</p> <p><i>H</i>=13.37, <i>p</i>=0.001, <i>df</i>=2,48</p> <p>Post Hoc<br/>Pre-Injection, Early Post-Injection, <i>p</i>=0.001<br/>Pre-Injection, Late Post-Injection, <i>p</i>=0.038<br/>Early Post-Injection, Late Post-Injection, <i>p</i>=0.495</p>                                                                                                                                                                                                                                                                                                                                                                                                                                            |       |      |       |            |            |



|                                                                                                                         |                                             |                                                                                    |                                                                                                                                                                                                                                                                                                                                                                                                                                                                                                                                                                                                     |
|-------------------------------------------------------------------------------------------------------------------------|---------------------------------------------|------------------------------------------------------------------------------------|-----------------------------------------------------------------------------------------------------------------------------------------------------------------------------------------------------------------------------------------------------------------------------------------------------------------------------------------------------------------------------------------------------------------------------------------------------------------------------------------------------------------------------------------------------------------------------------------------------|
| <b>Fig. 3c</b><br>LDA<br>decoding<br>accuracy<br>ketamine-<br>WM<br>compared to<br>chance (50%)                         | 17                                          | One sample t-<br>test, 2-tailed                                                    | Pre-Injection, $T=13.10$ , $p=5.70e-10$ , $df=16$<br>Early Post-Injection, $T=9.22$ , $p=8.42e-08$ , $df=16$<br>Last Post-Injection, $T=10.58$ , $p=1.24e-08$ , $df=16$                                                                                                                                                                                                                                                                                                                                                                                                                             |
| <b>Fig. 3d</b><br>Theoretical<br>decoding<br>accuracy<br>ketamine-<br>WM<br>compared<br>between<br>injection<br>periods | 17                                          | Kruskal-<br>Wallis one-<br>way analysis<br>of variance<br>with post hoc<br>testing | Pre-Injection, $mean=80.5$ , $median=82.9$<br>Early Post-Injection, $mean=67.4$ , $median=65.6$<br>Late Post-Injection, $mean=69.8$ , $median=66$<br><br>$H=17.96$ , $p=0.0001$ , $df=2,48$<br>Post Hoc<br>Pre-Injection, Early Post-Injection, $p=0.0002$<br>Pre-Injection, Late Post-Injection, $p=0.004$<br>Early Post-Injection, Late Post-Injection, $p=0.684$                                                                                                                                                                                                                                 |
| <b>Fig. 3e</b><br>Population<br>signal<br>compared<br>between<br>injection<br>periods                                   | Ketamine-<br>WM<br>17<br><br>Saline-WM<br>7 | Kruskal-<br>Wallis one-<br>way analysis<br>of variance<br>with post hoc<br>testing | <b>Ketamine-WM</b><br>Pre-Injection, $mean=4.8$ , $median=5.1$<br>Early Post-Injection, $mean=2.8$ , $median=2.6$<br>Late Post-Injection, $mean=3.8$ , $median=3.5$<br><br>$H=8.13$ , $p=0.017$ , $df=2,48$<br>Post Hoc<br>Pre-Injection, Early Post-Injection, $p=0.012$<br>Pre-Injection, Late Post-Injection, $p=0.374$<br>Early Post-Injection, Late Post-Injection, $p=0.286$<br><br><b>Saline-WM</b><br>Pre-Injection, $mean=5.2$ , $median=6.3$<br>Early Post-Injection, $mean=4.0$ , $median=5.0$<br>Late Post-Injection, $mean=3.3$ , $median=3.9$<br><br>$H=3.44$ , $p=0.179$ , $df=2,18$ |
| <b>Fig. 3f</b><br>Projected<br>precision<br>ketamine-<br>WM<br>compared<br>between                                      | Ketamine-<br>WM<br>17<br><br>Saline-WM<br>7 | Kruskal-<br>Wallis one-<br>way analysis<br>of variance<br>with post hoc<br>testing | <b>Ketamine-WM</b><br>Pre-Injection, $mean=0.49$ , $median=0.44$<br>Early Post-Injection, $mean=0.43$ , $median=0.39$<br>Late Post-Injection, $mean=0.38$ , $median=0.34$<br><br>$H=8.2$ , $p=0.017$ , $df=2,48$                                                                                                                                                                                                                                                                                                                                                                                    |

|                                                                                     |                                                                |                                               |                                                                                                                                                                                                                                                                                                                                                                                                                                                                                                                                              |
|-------------------------------------------------------------------------------------|----------------------------------------------------------------|-----------------------------------------------|----------------------------------------------------------------------------------------------------------------------------------------------------------------------------------------------------------------------------------------------------------------------------------------------------------------------------------------------------------------------------------------------------------------------------------------------------------------------------------------------------------------------------------------------|
| injection periods                                                                   |                                                                |                                               | <p>Post Hoc<br/> Pre-Injection, Early Post-Injection, <math>p=0.380</math><br/> Pre-Injection, Late Post-Injection, <math>p=0.012</math><br/> Early Post-Injection, Late Post-Injection, <math>p=0.275</math></p> <p><b>Saline-WM</b><br/> Pre-Injection, <math>mean=0.44</math>, <math>median=0.42</math><br/> Early Post-Injection, <math>mean=0.42</math>, <math>median=0.42</math><br/> Late Post-Injection, <math>mean=0.42</math>, <math>median=0.37</math></p> <p><math>H=0.36</math>, <math>p=0.834</math>, <math>df=2,18</math></p> |
| <b>Fig. 4d</b><br>Change in FR between injection periods for narrow spiking neurons | 17<br>$n=13$ (arrays per session containing selective neurons) | Wilcoxon signed-ranks test, 1-tailed          | <p><b>Preferred Location,</b><br/> Pre-Injection, <math>mean=0.45</math>, <math>median=0.47</math><br/> Post-Injection, <math>mean=0.28</math>, <math>median=0.21</math></p> <p><math>Z=1.66</math>, <math>p=0.049</math></p> <p><b>Least-Preferred Location,</b><br/> Pre-Injection, <math>mean=0.21</math>, <math>median=0.13</math><br/> Post-Injection, <math>mean=0.24</math>, <math>median=0.09</math></p> <p><math>Z=-0.116</math>, <math>p=0.546</math></p>                                                                          |
| <b>Fig. 4f</b><br>Change in FR between injection periods for broad spiking neurons  | 17<br>$n=27$ (arrays per session containing selective neurons) | Wilcoxon signed-ranks test, 1-tailed          | <p><b>Preferred Location,</b><br/> Pre-Injection, <math>mean=0.43</math>, <math>median=0.43</math><br/> Post-Injection, <math>mean=0.42</math>, <math>median=0.43</math></p> <p><math>Z=0.383</math>, <math>p=0.649</math></p> <p><b>Least-Preferred Location,</b><br/> Pre-Injection, <math>mean=0.23</math>, <math>median=0.25</math><br/> Post-Injection, <math>mean=0.34</math>, <math>median=0.36</math></p> <p><math>Z=-2.50</math>, <math>p=0.006</math></p>                                                                          |
| <b>Fig. 5b</b><br>Percent of fixation time on target                                | Ketamine<br>18<br><br>Saline<br>7                              | Two-way analysis of variance with interaction | <p><b>Ketamine:</b><br/> Pre-Injection, <math>mean=6.97</math>, <math>median=3.64</math><br/> Early Post-Injection, <math>mean=16.92</math>, <math>median=13.07</math><br/> Late Post-Injection, <math>mean=6.98</math>, <math>median=4.25</math></p> <p><b>Saline:</b><br/> Pre-Injection, <math>mean=7.28</math>, <math>median=1.85</math></p>                                                                                                                                                                                             |

|                                                                                                                                 |                                                                         |                                                        |                                                                                                                                                                                                                                                                                                                                                                                                                                                                                                             |
|---------------------------------------------------------------------------------------------------------------------------------|-------------------------------------------------------------------------|--------------------------------------------------------|-------------------------------------------------------------------------------------------------------------------------------------------------------------------------------------------------------------------------------------------------------------------------------------------------------------------------------------------------------------------------------------------------------------------------------------------------------------------------------------------------------------|
|                                                                                                                                 |                                                                         |                                                        | <p>Early Post-Injection, <i>mean</i>=6.65, <i>median</i>=2.15<br/>Late Post-Injection, <i>mean</i>=5.73, <i>median</i>=2.86</p> <p>Drug: <math>F=1.73, p=0.193, df=1,69</math><br/>Injection Period: <math>F=1.42, p=0.248, df=2,69</math><br/>Interaction: <math>F=1.35, p=0.267, df=2,69</math></p>                                                                                                                                                                                                       |
| <b>Fig. 5c</b><br>Eye data<br>SVM<br>decoding<br>compared<br>between<br>injection<br>periods                                    | 16                                                                      | Kruskal-<br>Wallis one-<br>way analysis<br>of variance | <p><b>Cue:</b><br/>Pre-Injection, <i>mean</i>=53.9, <i>median</i>=57.6<br/>Early Post-Injection, <i>mean</i>=52.2, <i>median</i>=52.0<br/>Late Post-Injection, <i>mean</i>=57.7, <i>median</i>=59.3</p> <p><math>H=4.01, p=0.135, df=2,45</math></p> <p><b>Delay:</b><br/>Pre-Injection, <i>mean</i>=47.8, <i>median</i>=47.8<br/>Early Post-Injection, <i>mean</i>=46.5, <i>median</i>=46.7<br/>Late Post-Injection, <i>mean</i>=52.1, <i>median</i>=51.8</p> <p><math>H=4.59, p=0.101, df=2,45</math></p> |
| <b>Fig. 5c</b><br>Eye data<br>SVM<br>decoding<br>accuracy<br>compared<br>between cue<br>and delay<br>epochs                     | 16<br><i>n</i> =48, data<br>combined<br>between<br>injection<br>periods | Wilcoxon<br>signed-ranks<br>test, 2-tailed             | $Z=3.18, p=0.002$                                                                                                                                                                                                                                                                                                                                                                                                                                                                                           |
| <b>Fig. 5d</b><br>SVM<br>decoding<br>accuracy for<br>eye data<br>compared to<br>decoding<br>accuracy for<br>neural<br>ensembles | 16                                                                      | Kruskal-<br>Wallis one-<br>way analysis<br>of variance | <p><b>Cue:</b><br/>Eye data<br/><i>mean</i>=53.9, <i>median</i>=57.6<br/>Neural data<br/><i>mean</i>=83.6, <i>median</i>=91</p> <p><math>H=14.78, p=0.0001, df=1,30</math></p> <p><b>Delay:</b><br/>Eye data<br/><i>mean</i>=47.8, <i>median</i>=47.8<br/>Neural data<br/><i>mean</i>=86.2, <i>median</i>=91.9</p>                                                                                                                                                                                          |



|  |  |                                                                                  |                                                                                                                                                                                                                                                                                                                                                                                                                                                                                                                                                                                                                                                                                                                                                                                                                                                                                                                                                                                                                                                                                                                                                                                                                                                                                                                                                                                                                                                                                                                                                                                                                                                                                                                                                                                                                                                                                                                                                                                                                                           |
|--|--|----------------------------------------------------------------------------------|-------------------------------------------------------------------------------------------------------------------------------------------------------------------------------------------------------------------------------------------------------------------------------------------------------------------------------------------------------------------------------------------------------------------------------------------------------------------------------------------------------------------------------------------------------------------------------------------------------------------------------------------------------------------------------------------------------------------------------------------------------------------------------------------------------------------------------------------------------------------------------------------------------------------------------------------------------------------------------------------------------------------------------------------------------------------------------------------------------------------------------------------------------------------------------------------------------------------------------------------------------------------------------------------------------------------------------------------------------------------------------------------------------------------------------------------------------------------------------------------------------------------------------------------------------------------------------------------------------------------------------------------------------------------------------------------------------------------------------------------------------------------------------------------------------------------------------------------------------------------------------------------------------------------------------------------------------------------------------------------------------------------------------------------|
|  |  | <p>Repeated measures analysis of variance with post hoc pairwise comparisons</p> | <p>Ket early post-injection, Sal early post-injection, <math>p=0</math><br/> Ket early post-injection, Ket late post-injection, <math>p=0.0001</math><br/> Ket early post-injection, Sal late post-injection, <math>p=0.0006</math><br/> Sal early post-injection, Ket late post-injection, <math>p=0.735</math><br/> Sal early post-injection, Sal late post-injection, <math>p=0.962</math><br/> Ket late post-injection, Sal late post-injection, <math>p=0.998</math></p> <p><b>NHP T</b><br/> <b>Ketamine-WM:</b><br/> Pre-Injection, <math>mean=54, median=60</math><br/> Early Post-Injection, <math>mean=30, median=24</math><br/> Late Post-Injection, <math>mean=47, median=56</math></p> <p><math>F=6.19, p=0.010, df=2,16</math><br/> Post Hoc<br/> Pre-Injection, Early Post-Injection, <math>p=0.0099</math><br/> Pre-Injection, Late Post-Injection, <math>p=0.662</math><br/> Early Post-Injection, Late Post-Injection, <math>p=0.057</math></p> <p><b>Saline-WM:</b><br/> Pre-Injection, <math>mean=65, median=70</math><br/> Early Post-Injection, <math>mean=55, median=56</math><br/> Late Post-Injection, <math>mean=42, median=57</math></p> <p><math>F=1.55, p=0.318, df=2,4</math></p> <p>Drug: <math>F=2.76, p=0.107, df=1,30</math><br/> Injection Period: <math>F=2.99, p=0.066, df=2,30</math><br/> Interaction: <math>F=2.15, p=0.135, df=2,30</math></p> <p>Ket pre-injection, Sal pre-injection, <math>p=0.894</math><br/> Ket pre-injection, Ket early post-injection, <math>p=0.037</math><br/> Ket pre-injection, Sal early post-injection, <math>p=1</math><br/> Ket pre-injection, Ket late post-injection, <math>p=0.961</math><br/> Ket pre-injection, Sal late post-injection, <math>p=0.864</math><br/> Sal pre-injection, Ket early post-injection, <math>p=0.027</math><br/> Sal pre-injection, Sal early post-injection, <math>p=0.972</math><br/> Sal pre-injection, Ket late post-injection, <math>p=0.581</math><br/> Sal pre-injection, Sal late post-injection, <math>p=0.487</math></p> |
|  |  | <p>Two-way analysis of variance</p>                                              |                                                                                                                                                                                                                                                                                                                                                                                                                                                                                                                                                                                                                                                                                                                                                                                                                                                                                                                                                                                                                                                                                                                                                                                                                                                                                                                                                                                                                                                                                                                                                                                                                                                                                                                                                                                                                                                                                                                                                                                                                                           |

|                                                                                                        |                                            |                                                                                                            |                                                                                                                                                                                                                                                                                                                                                                                                                                                                                                                                                                      |
|--------------------------------------------------------------------------------------------------------|--------------------------------------------|------------------------------------------------------------------------------------------------------------|----------------------------------------------------------------------------------------------------------------------------------------------------------------------------------------------------------------------------------------------------------------------------------------------------------------------------------------------------------------------------------------------------------------------------------------------------------------------------------------------------------------------------------------------------------------------|
|                                                                                                        |                                            |                                                                                                            | Ket early post-injection, $p=0.198$<br>Ket early post-injection, $p=0.205$<br>Ket early post-injection, $p=0.873$<br>Sal early post-injection, $p=0.980$<br>Sal early post-injection, $p=0.904$<br>Ket late post-injection, $p=0.993$<br>Sal early post-injection, $p=0.198$<br>Ket late post-injection, $p=0.205$<br>Sal late post-injection, $p=0.873$<br>Ket late post-injection, $p=0.980$<br>Sal late post-injection, $p=0.904$<br>Sal late post-injection, $p=0.993$                                                                                           |
| <b>Extended Data 1c, d</b><br>Response time compared between injection periods                         | NHP B 9<br>$n=64$<br><br>NHP T 9<br>$n=62$ | Repeated measures analysis of variance with post hoc pairwise comparisons                                  | <b>NHP B:</b><br>Pre-Injection, $mean=2.6, median=2.4$<br>Early Post-Injection, $mean=3.5, median=3.0$<br>Late Post-Injection, $mean=2.7, median=2.5$<br><br>$F=19.73, p=3.50e-08, df=2,126$<br>Post Hoc<br>Pre-Injection, Early Post-Injection, $p<0.0001$<br>Pre-Injection, Late Post-Injection, $p=0.553$<br>Early Post-Injection, Late Post-Injection, $p<0.0001$<br><br><b>NHP T:</b><br>Pre-Injection, $mean=2.7, median=2.3$<br>Early Post-Injection, $mean=2.9, median=2.8$<br>Late Post-Injection, $mean=2.8, median=2.4$<br><br>$F=1.5, p=0.226, df=2,122$ |
| <b>Extended Data 2a, b</b><br>Proportion of tuned units ketamine-WM compared between injection periods | NHP B 9<br>$n=27$<br><br>NHP T 8<br>$n=24$ | Analysis of variance with post hoc testing<br><br><br>Chi-Square Test<br><br><br>Analysis of variance with | <b>NHP B:</b><br>$F=9.9, p<0.0001, df=2,159$<br>Post Hoc<br>Pre-Injection, Early Post-Injection, $p=0.0001$<br>Pre-Injection, Late Post-Injection, $p=0.820$<br>Early Post-Injection, Late Post-Injection, $p=0.0013$<br><br>Pre-Injection, Early Post-Injection, $p=0, X^2=133.83$<br>Pre-Injection, Late Post-Injection, $p=0.62, X^2=0.25$<br>Early Post-Injection, Late Post-Injection, $p=0, X^2=143.7$<br><br><b>NHP T:</b><br>$F=3.96, p=0.021, df=2,141$<br>Post Hoc<br>Pre-Injection, Early Post-Injection, $p=0.019$                                       |

|                                                                                                    |                                                                                |                                                                   |                                                                                                                                                                                                                                                                                                                                                                                                                                                                                                                                                            |
|----------------------------------------------------------------------------------------------------|--------------------------------------------------------------------------------|-------------------------------------------------------------------|------------------------------------------------------------------------------------------------------------------------------------------------------------------------------------------------------------------------------------------------------------------------------------------------------------------------------------------------------------------------------------------------------------------------------------------------------------------------------------------------------------------------------------------------------------|
|                                                                                                    |                                                                                | post hoc testing<br><br>Chi-Square Test                           | Pre-Injection, Late Post-Injection, $p=0.108$<br>Early Post-Injection, Late Post-Injection, $p=0.769$<br><br>Pre-Injection, Early Post-Injection, $p=0.14$ , $X^2=2.22$<br>Pre-Injection, Late Post-Injection, $p=0.105$ , $X^2=2.63$<br>Early Post-Injection, Late Post-Injection, $p=0.89$ , $X^2=0.018$                                                                                                                                                                                                                                                 |
| <b>Extended Data 2c</b><br>Overall change in FR between injection periods                          | 17 Cue, $n=604$ neurons<br>Delay, $n=475$ neurons<br>Response, $n=671$ neurons | One-way analysis of variance                                      | <b>Cue:</b><br>Pre-Injection, $mean=8.7$ , $median=6.1$<br>Post-Injection, $mean=9.7$ , $median=6.5$<br><br>$F=3.28$ , $p=0.073$ , $df=1,1206$<br><br><b>Delay:</b><br>Pre-Injection, $mean=8.2$ , $median=5.6$<br>Post-Injection, $mean=8.8$ , $median=5.7$<br><br>$F=1.21$ , $p=0.272$ , $df=1,948$<br><br><b>Response:</b><br>Pre-Injection, $mean=8.4$ , $median=5.6$<br>Post-Injection, $mean=9.0$ , $median=5.7$<br><br>$F=1.56$ , $p=0.212$ , $df=1,1340$                                                                                           |
| <b>Extended Data 3c, d</b><br>SVM decoding accuracy ketamine-WM compared between injection periods | NHP T<br>7<br>NHP B<br>9                                                       | Kruskal-Wallis one-way analysis of variance with post hoc testing | <b>NHP T: Ensembles of 16 neurons</b><br><b>Cue:</b> $H=1.9$ , $p=0.387$ , $df=2,18$<br><br><b>Delay:</b> $H=8.22$ , $p=0.016$ , $df=2,18$<br>Post Hoc<br>Pre-Injection, Early Post-Injection, $p=0.021$<br>Pre-Injection, Late Post-Injection, $p=0.065$<br>Early Post-Injection, Late Post-Injection, $p=0.903$<br><br><b>Response:</b> $H=6.24$ , $p=0.044$ , $df=2,18$<br>Post Hoc<br>Pre-Injection and Early Post-Injection, $p=0.033$<br>Pre-Injection and Late Post-Injection, $p=0.424$<br>Early Post-Injection and Late Post-Injection, $p=0.424$ |

|                                                                                                   |                                       |                                    |                                                                                                                                                                                                                                                                                                                                                                                                                                                                                                                                                                                                                                                                                                                                                                                                                                                                                        |
|---------------------------------------------------------------------------------------------------|---------------------------------------|------------------------------------|----------------------------------------------------------------------------------------------------------------------------------------------------------------------------------------------------------------------------------------------------------------------------------------------------------------------------------------------------------------------------------------------------------------------------------------------------------------------------------------------------------------------------------------------------------------------------------------------------------------------------------------------------------------------------------------------------------------------------------------------------------------------------------------------------------------------------------------------------------------------------------------|
|                                                                                                   |                                       |                                    | <p><b>NHP B: Ensembles of 16 neurons</b><br/> <b>Cue:</b> <math>H=9.76, p=0.008, df=2,24</math><br/> Post Hoc<br/> Pre-Injection and Early Post-Injection, <math>p=0.008</math><br/> Pre-Injection and Late Post-Injection, <math>p=0.062</math><br/> Early Post-Injection and Late Post-Injection, <math>p=0.738</math></p> <p><b>Delay:</b> <math>H=12.67, p=0.002, df=2,24</math><br/> Post Hoc<br/> Pre-Injection, Early Post-Injection, <math>p=0.009</math><br/> Pre-Injection, Late Post-Injection, <math>p=0.004</math><br/> Early Post-Injection, Late Post-Injection, <math>p=0.961</math></p> <p><b>Response:</b> <math>H=6.43, p=0.040, df=2,24</math><br/> Post Hoc<br/> Pre-Injection, Early Post-Injection, <math>p=0.054</math><br/> Pre-Injection, Late Post-Injection, <math>p=0.100</math><br/> Early Post-Injection, Late Post-Injection, <math>p=0.961</math></p> |
| <p><b>Extended Data 3c, d</b><br/> SVM decoding accuracy ketamine-WM compared to chance (33%)</p> | <p>NHP T<br/> 7<br/> NHP B<br/> 9</p> | <p>One sample t-test, 2-tailed</p> | <p><b>NHP T: Ensembles of 16 neurons</b><br/> <b>Cue:</b><br/> Pre: <math>T=5.5, p=0.002, df=6</math><br/> Early-Post: <math>T=14.3, p=7.39e-06, df=6</math><br/> Late-Post: <math>T=8.32, p=0.0002, df=6</math></p> <p><b>Delay:</b><br/> Pre: <math>T=8.42, p=0.0002, df=6</math><br/> Early-Post: <math>T=7.9, p=0.0002, df=6</math><br/> Late-Post: <math>T=14.8, p=5.97e-06, df=6</math></p> <p><b>Response:</b><br/> Pre: <math>T=8.65, p=0.0001, df=6</math><br/> Early-Post: <math>T=8.04, p=0.0002, df=6</math><br/> Late-Post: <math>T=12.18, p=1.86e-05, df=6</math></p> <p><b>NHP B: Ensembles of 16 neurons</b><br/> <b>Cue:</b><br/> Pre: <math>T=74.78, p=1.14e-12, df=8</math><br/> Early-Post: <math>T=17.15, p=1.36e-07, df=8</math><br/> Late-Post: <math>T=17.05, p=1.42e-07, df=8</math></p>                                                                      |



|                                                                                                   |                                                                       |                                                                   |                                                                                                                                                                                                                                                                                                                                                                                                                                                                                                                                                                                                                                                                                                                                                                                                                                                                                                                                                       |
|---------------------------------------------------------------------------------------------------|-----------------------------------------------------------------------|-------------------------------------------------------------------|-------------------------------------------------------------------------------------------------------------------------------------------------------------------------------------------------------------------------------------------------------------------------------------------------------------------------------------------------------------------------------------------------------------------------------------------------------------------------------------------------------------------------------------------------------------------------------------------------------------------------------------------------------------------------------------------------------------------------------------------------------------------------------------------------------------------------------------------------------------------------------------------------------------------------------------------------------|
|                                                                                                   |                                                                       |                                                                   | <p><b>Delay:</b><br/> Pre: <math>T=53.21, p=1.73e-11, df=8</math><br/> Early-Post: <math>T=11.88, p=2.32e-06, df=8</math><br/> Late-Post: <math>T=8.21, p=3.62e-05, df=8</math></p> <p><b>Response:</b><br/> Pre: <math>T=37.13, p=3.04e-10, df=8</math><br/> Early-Post: <math>T=9.81, p=9.79e-06, df=8</math><br/> Late-Post: <math>T=7.67, p=5.90e-05, df=8</math></p>                                                                                                                                                                                                                                                                                                                                                                                                                                                                                                                                                                             |
| <b>Extended Data 3e</b><br>Decoding accuracy compared to shuffled results                         | 16                                                                    | Kruskal-Wallis one-way analysis of variance                       | <p>Pre-Injection:<br/> <math>H=71.26, p=3.13e-17, df=1,94</math></p> <p>Early Post-Injection:<br/> <math>H=71.26, p=3.13e-17, df=1,94</math></p> <p>Late Post-Injection:<br/> <math>H=71.26, p=3.13e-17, df=1,94</math></p>                                                                                                                                                                                                                                                                                                                                                                                                                                                                                                                                                                                                                                                                                                                           |
| <b>Extended Data 4a</b><br>Correct trial SVM decoding accuracy compared between injection periods | Pre-injection 13<br>Early Post-Injection 12<br>Late Post-Injection 16 | Kruskal-Wallis one-way analysis of variance with post hoc testing | <p><b>Cue:</b><br/> Pre-Injection, <math>mean=94.5, median=95.8</math><br/> Early Post-Injection, <math>mean=76.9, median=71.4</math><br/> Late Post-Injection, <math>mean=82.4, median=88.3</math></p> <p><math>H=11.11, p=0.004, df=2,38</math><br/> Post Hoc<br/> Pre-Injection, Early Post-Injection, <math>p=0.004</math><br/> Pre-Injection, Late Post-Injection, <math>p=0.031</math><br/> Early Post-Injection, Late Post-Injection, <math>p=0.671</math></p> <p><b>Delay:</b><br/> Pre-Injection, <math>mean=93.4, median=95.2</math><br/> Early Post-Injection, <math>mean=80.5, median=79.5</math><br/> Late Post-Injection, <math>mean=86.6, median=90.9</math></p> <p><math>H=8.35, p=0.015, df=2,38</math><br/> Post Hoc<br/> Pre-Injection and Early Post-Injection, <math>p=0.012</math><br/> Pre-Injection and Late Post-Injection, <math>p=0.139</math><br/> Early Post-Injection and Late Post-Injection, <math>p=0.499</math></p> |

|                                                                                                   |                                                                               |                                      |                                                                                                                                                                                                                                                                                                                                                                                                                                                                                                                                                                                                                                               |
|---------------------------------------------------------------------------------------------------|-------------------------------------------------------------------------------|--------------------------------------|-----------------------------------------------------------------------------------------------------------------------------------------------------------------------------------------------------------------------------------------------------------------------------------------------------------------------------------------------------------------------------------------------------------------------------------------------------------------------------------------------------------------------------------------------------------------------------------------------------------------------------------------------|
|                                                                                                   |                                                                               |                                      | <p><b>Response:</b><br/> Pre-Injection, <i>mean</i>=95.8, <i>median</i>=96.3<br/> Early Post-Injection, <i>mean</i>=87.6, <i>median</i>=92.9<br/> Late Post-Injection, <i>mean</i>=90.4, <i>median</i>=94</p> <p><i>H</i>=5.5, <i>p</i>=0.064, <i>df</i>=2,38<br/> Post Hoc<br/> Pre-Injection and Early Post-Injection, <i>p</i>=0.062<br/> Pre-Injection and Late Post-Injection, <i>p</i>=0.201<br/> Early Post-Injection and Late Post-Injection, <i>p</i>=0.768</p>                                                                                                                                                                      |
| <p><b>Extended Data 4a</b><br/> Correct trial SVM decoding accuracy compared to chance (33%)</p>  | Pre-injection 13<br><br>Early Post-Injection 12<br><br>Late Post-Injection 16 | One sample t-test, 2-tailed          | <p><b>Cue:</b><br/> Pre: <i>T</i>=40.61, <i>p</i>=3.21e-14, <i>df</i>=12<br/> Early-Post: <i>T</i>=10.19, <i>p</i>=6.1e-07, <i>df</i>=11<br/> Late-Post: <i>T</i>=13.38, <i>p</i>=9.65e-10, <i>df</i>=15</p> <p><b>Delay:</b><br/> Pre: <i>T</i>=28.01, <i>p</i>=2.66e-12, <i>df</i>=12<br/> Early-Post: <i>T</i>=12.88, <i>p</i>=5.6e-08, <i>df</i>=11<br/> Late-Post: <i>T</i>=18.84, <i>p</i>=7.46e-12, <i>df</i>=15</p> <p><b>Response:</b><br/> Pre: <i>T</i>=52.63, <i>p</i>=1.46e-15, <i>df</i>=12<br/> Early-Post: <i>T</i>=15.05, <i>p</i>=1.1e-08, <i>df</i>=11<br/> Late-Post: <i>T</i>=24.81, <i>p</i>=1.36e-13, <i>df</i>=15</p> |
| <p><b>Extended Data 4b</b><br/> SVM decoding accuracy compared between correct and all trials</p> | Pre-injection 13<br><br>Early Post-Injection 12<br><br>Late Post-Injection 16 | Wilcoxon signed-ranks test, 1-tailed | <p><b>Pre-Injection Period:</b><br/> Cue: <i>Z</i>=1.38, <i>p</i>=0.083<br/> Delay: <i>Z</i>=0.719, <i>p</i>=0.236<br/> Response: <i>Z</i>=1.44, <i>p</i>=0.075</p> <p><b>Early Post-Injection Period:</b><br/> Cue: <i>Z</i>=1.53, <i>p</i>=0.063<br/> Delay: <i>Z</i>=1.76, <i>p</i>=0.039<br/> Response: <i>Z</i>=2.80, <i>p</i>=0.003</p> <p><b>Late Post-Injection Period</b><br/> Cue: <i>Z</i>=1.52, <i>p</i>=0.063<br/> Delay: <i>Z</i>=3.07, <i>p</i>=0.001</p>                                                                                                                                                                      |

|                                                                                                    |                                                                              |                                                                   |                                                                                                                                                                                                                                                                                                                                                                                                                                                                                                                                                                                                                                                                                                                                                                                                                                                                                                                     |
|----------------------------------------------------------------------------------------------------|------------------------------------------------------------------------------|-------------------------------------------------------------------|---------------------------------------------------------------------------------------------------------------------------------------------------------------------------------------------------------------------------------------------------------------------------------------------------------------------------------------------------------------------------------------------------------------------------------------------------------------------------------------------------------------------------------------------------------------------------------------------------------------------------------------------------------------------------------------------------------------------------------------------------------------------------------------------------------------------------------------------------------------------------------------------------------------------|
|                                                                                                    |                                                                              |                                                                   | Response: $Z=3.41, p=0.0003$                                                                                                                                                                                                                                                                                                                                                                                                                                                                                                                                                                                                                                                                                                                                                                                                                                                                                        |
| <b>Extended Data 5b</b><br>LDA decoding accuracy compared to theoretical decoding accuracy         | 17<br>$n=51$ (values combined between trial epochs for pre-injection period) | Kruskal-Wallis one-way analysis of variance                       | $H=1.87, p=0.171, df=1,100$                                                                                                                                                                                                                                                                                                                                                                                                                                                                                                                                                                                                                                                                                                                                                                                                                                                                                         |
| <b>Extended Data 5c, e</b><br>LDA decoding accuracy ketamine-WM compared between injection periods | NHP B<br>9<br><br>NHP T<br>8                                                 | Kruskal-Wallis one-way analysis of variance with post hoc testing | <p><b>NHP B:</b><br/>Pre-Injection, <math>mean=84.3, median=85.6</math><br/>Early Post-Injection, <math>mean=69.8, median=66.5</math><br/>Late Post-Injection, <math>mean=73.4, median=77.7</math></p> <p><math>H=13.24, p=0.001, df=2,24</math><br/>Pre-Injection, Early Post-Injection, <math>p=0.002</math><br/>Pre-Injection, Late Post-Injection, <math>p=0.021</math><br/>Early Post-Injection, Late Post-Injection, <math>p=0.702</math></p> <p><b>NHP T:</b><br/>Pre-Injection, <math>mean=70.8, median=70.9</math><br/>Early Post-Injection, <math>mean=61.6, median=62.0</math><br/>Late Post-Injection, <math>mean=64.0, median=63.7</math></p> <p><math>H=8.42, p=0.015, df=2,21</math><br/>Post Hoc<br/>Pre-Injection, Early Post-Injection, <math>p=0.011</math><br/>Pre-Injection, Late Post-Injection, <math>p=0.265</math><br/>Early Post-Injection, Late Post-Injection, <math>p=0.371</math></p> |
| <b>Extended Data 5c, e</b><br>LDA decoding accuracy ketamine-WM compared to chance (50%)           | NHP B<br>9<br><br>NHP T<br>8                                                 | One sample t-test, 2-tailed                                       | <p><b>NHP B</b><br/>Pre-Injection: <math>T=25.15, p=6.68e-09, df=8</math><br/>Early Post-Injection: <math>T=7.63, p=6.12e-05, df=8</math><br/>Late Post-Injection: <math>T=9.11, p=1.70e-05, df=8</math></p> <p><b>NHP T</b><br/>Pre-Injection: <math>T=8.49, p=6.21e-05, df=7</math><br/>Early Post-Injection: <math>T=12.75, p=4.23e-06, df=7</math><br/>Late Post-Injection: <math>T=18.28, p=3.63e-07, df=7</math></p>                                                                                                                                                                                                                                                                                                                                                                                                                                                                                          |

|                                                                                                                    |                                         |                                                                          |                                                                                                                                                                                                                                                                                                                                                                                                                                                                                                                                                                                                                                                                                                                                                                                                                                                                                                                           |
|--------------------------------------------------------------------------------------------------------------------|-----------------------------------------|--------------------------------------------------------------------------|---------------------------------------------------------------------------------------------------------------------------------------------------------------------------------------------------------------------------------------------------------------------------------------------------------------------------------------------------------------------------------------------------------------------------------------------------------------------------------------------------------------------------------------------------------------------------------------------------------------------------------------------------------------------------------------------------------------------------------------------------------------------------------------------------------------------------------------------------------------------------------------------------------------------------|
| <p><b>Extended Data 5d, f</b><br/>Theoretical decoding accuracy ketamine-WM compared between injection periods</p> | <p>NHP B<br/>9<br/><br/>NHP T<br/>8</p> | <p>Kruskal-Wallis one-way analysis of variance with post hoc testing</p> | <p><b>NHP B:</b><br/>Pre-Injection, <i>mean</i>=85.1, <i>median</i>=85.9<br/>Early Post-Injection, <i>mean</i>=71.3, <i>median</i>=67.9<br/>Late Post-Injection, <i>mean</i>=73.3, <i>median</i>=76.9<br/><br/><i>H</i>=13.36, <i>p</i>=0.001, <i>df</i>=2,24<br/>Post Hoc<br/>Pre-Injection, Early Post-Injection, <i>p</i>=0.004<br/>Pre-Injection, Late Post-Injection, <i>p</i>=0.006<br/>Early Post-Injection, Late Post-Injection, <i>p</i>=0.988<br/><br/><b>NHP T:</b><br/>Pre-Injection, <i>mean</i>=75.3, <i>median</i>=77.4<br/>Early Post-Injection, <i>mean</i>=63.0, <i>median</i>=62.8<br/>Late Post-Injection, <i>mean</i>=65.9, <i>median</i>=65.2<br/><br/><i>H</i>=11.54, <i>p</i>=0.003, <i>df</i>=2,21<br/>Post Hoc<br/>Pre-Injection, Early Post-Injection, <i>p</i>=0.002<br/>Pre-Injection, Late Post-Injection, <i>p</i>=0.169<br/>Early Post-Injection, Late Post-Injection, <i>p</i>=0.250</p> |
| <p><b>Extended Data 5g</b><br/>LDA decoding accuracy saline-WM compared between injection periods</p>              | <p>7</p>                                | <p>Kruskal-Wallis one-way analysis of variance</p>                       | <p>Pre-Injection, <i>mean</i>=77.0, <i>median</i>=79.5<br/>Early Post-Injection, <i>mean</i>=72.9, <i>median</i>=77.3<br/>Late Post-Injection, <i>mean</i>=68.9, <i>median</i>=73.5<br/><br/><i>H</i>=2.43, <i>p</i>=0.297, <i>df</i>=2,18</p>                                                                                                                                                                                                                                                                                                                                                                                                                                                                                                                                                                                                                                                                            |
| <p><b>Extended Data 5h</b><br/>Theoretical decoding accuracy saline-WM compared between injection periods</p>      | <p>7</p>                                | <p>Kruskal-Wallis one-way analysis of variance</p>                       | <p>Pre-Injection, <i>mean</i>=79.6, <i>median</i>=81.2<br/>Early Post-Injection, <i>mean</i>=73.4, <i>median</i>=77.1<br/>Late Post-Injection, <i>mean</i>=70.2, <i>median</i>=73.1<br/><br/><i>H</i>=3.95, <i>p</i>=0.139, <i>df</i>=2,18</p>                                                                                                                                                                                                                                                                                                                                                                                                                                                                                                                                                                                                                                                                            |

|                                                                                                          |                                         |                                                                          |                                                                                                                                                                                                                                                                                                                                                                                                                                                                                                                                                                                                                                                                                                                                                                                                                                                                                                                            |
|----------------------------------------------------------------------------------------------------------|-----------------------------------------|--------------------------------------------------------------------------|----------------------------------------------------------------------------------------------------------------------------------------------------------------------------------------------------------------------------------------------------------------------------------------------------------------------------------------------------------------------------------------------------------------------------------------------------------------------------------------------------------------------------------------------------------------------------------------------------------------------------------------------------------------------------------------------------------------------------------------------------------------------------------------------------------------------------------------------------------------------------------------------------------------------------|
| <p><b>Extended Data 5i, k</b><br/>Population signal ketamine-WM compared between injection periods</p>   | <p>NHP B<br/>9<br/><br/>NHP T<br/>8</p> | <p>Kruskal-Wallis one-way analysis of variance with post hoc testing</p> | <p><b>NHP B:</b><br/>Pre-Injection, <i>mean</i>=6.4, <i>median</i>=6.3<br/>Early Post-Injection, <i>mean</i>=3.8, <i>median</i>=3.9<br/>Late Post-Injection, <i>mean</i>=5.2, <i>median</i>=5.4<br/><br/><i>H</i>=12.91, <i>p</i>=0.001, <i>df</i>=2,24<br/>Post Hoc<br/>Pre-Injection, Early Post-Injection, <i>p</i>=0.001<br/>Pre-Injection, Late Post-Injection, <i>p</i>=0.186<br/>Early Post-Injection, Late Post-Injection, <i>p</i>=0.156<br/><br/><b>NHP T:</b><br/>Pre-Injection, <i>mean</i>=2.9, <i>median</i>=2.5<br/>Early Post-Injection, <i>mean</i>=1.7, <i>median</i>=1.6<br/>Late Post-Injection, <i>mean</i>=2.1, <i>median</i>=2.0<br/><br/><i>H</i>=4.82, <i>p</i>=0.090, <i>df</i>=2,21<br/>Post Hoc<br/>Pre-Injection, Early Post-Injection, <i>p</i>=0.073<br/>Pre-Injection, Late Post-Injection, <i>p</i>=0.583<br/>Early Post-Injection, Late Post-Injection, <i>p</i>=0.452</p>               |
| <p><b>Extended Data 5j, l</b><br/>Projected precision ketamine-WM compared between injection periods</p> | <p>NHP B<br/>9<br/><br/>NHP T<br/>8</p> | <p>Kruskal-Wallis one-way analysis of variance with post hoc testing</p> | <p><b>NHP B:</b><br/>Pre-Injection, <i>mean</i>=0.40, <i>median</i>=0.40<br/>Early Post-Injection, <i>mean</i>=0.39, <i>median</i>=0.37<br/>Late Post-Injection, <i>mean</i>=0.30, <i>median</i>=0.32<br/><br/><i>H</i>=14.51, <i>p</i>=0.0007, <i>df</i>=2,24<br/>Post Hoc<br/>Pre-Injection, Early Post-Injection, <i>p</i>=0.646<br/>Pre-Injection, Late Post-Injection, <i>p</i>=0.0008<br/>Early Post-Injection, Late Post-Injection, <i>p</i>=0.016<br/><br/><b>NHP T:</b><br/>Pre-Injection, <i>mean</i>=0.60, <i>median</i>=0.58<br/>Early Post-Injection, <i>mean</i>=0.48, <i>median</i>=0.52<br/>Late Post-Injection, <i>mean</i>=0.47, <i>median</i>=0.48<br/><br/><i>H</i>=3.86, <i>p</i>=0.145, <i>df</i>=2,21<br/>Post Hoc<br/>Pre-Injection, Early Post-Injection, <i>p</i>=0.235<br/>Pre-Injection, Late Post-Injection, <i>p</i>=0.181<br/>Early Post-Injection, Late Post-Injection, <i>p</i>=0.989</p> |

|                                                                                                   |                                                                                                                      |                                            |                                                                                                                                                                                                                                                                                                                                                                                                                                                                                                                                                                                                                                                                                                                                                                                                                                                                                      |
|---------------------------------------------------------------------------------------------------|----------------------------------------------------------------------------------------------------------------------|--------------------------------------------|--------------------------------------------------------------------------------------------------------------------------------------------------------------------------------------------------------------------------------------------------------------------------------------------------------------------------------------------------------------------------------------------------------------------------------------------------------------------------------------------------------------------------------------------------------------------------------------------------------------------------------------------------------------------------------------------------------------------------------------------------------------------------------------------------------------------------------------------------------------------------------------|
| <p><b>Extended Data 6a, b</b><br/>Change in FR for narrow and broad spiking neurons saline-WM</p> | <p>7<br/>Narrow, <math>n=5</math> (arrays per session containing selective neurons)<br/>Broad, <math>n=11</math></p> | <p>Wilcoxon signed-ranks test, 1-sided</p> | <p><b>Narrow:</b><br/><b>Preferred Location,</b><br/>Pre-Injection, <math>mean=0.43</math>, <math>median=0.47</math><br/>Post-Injection, <math>mean=0.42</math>, <math>median=0.48</math><br/><br/><math>p=0.500</math></p> <p><b>Least-Preferred Location,</b><br/>Pre-Injection, <math>mean=0.32</math>, <math>median=0.35</math><br/>Post-Injection, <math>mean=0.26</math>, <math>median=0.33</math><br/><br/><math>p=0.500</math></p> <p><b>Broad:</b><br/><b>Preferred Location,</b><br/>Pre-Injection, <math>mean=0.52</math>, <math>median=0.51</math><br/>Post-Injection, <math>mean=0.42</math>, <math>median=0.45</math><br/><br/><math>p=0.803</math></p> <p><b>Least-Preferred Location,</b><br/>Pre-Injection, <math>mean=0.29</math>, <math>median=0.29</math><br/>Post-Injection, <math>mean=0.32</math>, <math>median=0.28</math><br/><br/><math>p=0.422</math></p> |
| <p><b>Extended Data 6c</b><br/>Narrow spiking ranked target location responses</p>                | <p>Narrow, <math>n=13</math></p>                                                                                     | <p>Wilcoxon signed-ranks test, 1-sided</p> | <p><b>Rank 1</b><br/>Pre-Injection, <math>mean=0.343</math>, <math>median=0.363</math><br/>Post-Injection, <math>mean=0.212</math>, <math>median=0.161</math><br/><math>Z=1.66</math>, <math>p=0.049</math></p> <p><b>Rank 2</b><br/>Pre-Injection, <math>mean=0.302</math>, <math>median=0.383</math><br/>Post-Injection, <math>mean=0.245</math>, <math>median=0.255</math><br/><math>Z=0.843</math>, <math>p=0.120</math></p> <p><b>Rank 3</b><br/>Pre-Injection, <math>mean=0.264</math>, <math>median=0.323</math><br/>Post-Injection, <math>mean=0.278</math>, <math>median=0.282</math><br/><math>Z=-0.217</math>, <math>p=0.586</math></p> <p><b>Rank 4</b></p>                                                                                                                                                                                                              |

|                                                                           |               |                                     |                                                                                                                                                                                                                                                                                                                                                                                                                                                                                                                                                                                                                                                                                                                                                                                                                                                                                                                                                                                                                                                                                                                                                     |
|---------------------------------------------------------------------------|---------------|-------------------------------------|-----------------------------------------------------------------------------------------------------------------------------------------------------------------------------------------------------------------------------------------------------------------------------------------------------------------------------------------------------------------------------------------------------------------------------------------------------------------------------------------------------------------------------------------------------------------------------------------------------------------------------------------------------------------------------------------------------------------------------------------------------------------------------------------------------------------------------------------------------------------------------------------------------------------------------------------------------------------------------------------------------------------------------------------------------------------------------------------------------------------------------------------------------|
|                                                                           |               |                                     | <p>Pre-Injection, <i>mean</i>=0.246, <i>median</i>=0.224<br/> Post-Injection, <i>mean</i>=0.254, <i>median</i>=0.164<br/> <math>Z=0.232</math>, <math>p=0.592</math></p> <p><b>Rank 5</b><br/> Pre-Injection, <i>mean</i>=0.219, <i>median</i>=0.242<br/> Post-Injection, <i>mean</i>=0.230, <i>median</i>=0.234<br/> <math>Z=0.027</math>, <math>p=0.511</math></p> <p><b>Rank 6</b><br/> Pre-Injection, <i>mean</i>=0.210, <i>median</i>=0.213<br/> Post-Injection, <i>mean</i>=0.246, <i>median</i>=0.194<br/> <math>Z=-0.299</math>, <math>p=0.382</math></p> <p><b>Rank 7</b><br/> Pre-Injection, <i>mean</i>=0.196, <i>median</i>=0.147<br/> Post-Injection, <i>mean</i>=0.274, <i>median</i>=0.298<br/> <math>Z=-0.708</math>, <math>p=0.240</math></p> <p><b>Rank 8</b><br/> Pre-Injection, <i>mean</i>=0.204, <i>median</i>=0.184<br/> Post-Injection, <i>mean</i>=0.312, <i>median</i>=0.278<br/> <math>Z=-0.380</math>, <math>p=0.352</math></p> <p><b>Rank 9</b><br/> Pre-Injection, <i>mean</i>=0.158, <i>median</i>=0.102<br/> Post-Injection, <i>mean</i>=0.182, <i>median</i>=0.072<br/> <math>Z=0</math>, <math>p=0.500</math></p> |
| <b>Extended Data 6d</b><br>Broad spiking ranked target location responses | Broad, $n=27$ | Wilcoxon signed-ranks test, 1-sided | <p><b>Rank 1</b><br/> Pre-Injection, <i>mean</i>=0.388, <i>median</i>=0.388<br/> Post-Injection, <i>mean</i>=0.375, <i>median</i>=0.383<br/> <math>Z=0.436</math>, <math>p=0.332</math></p> <p><b>Rank 2</b><br/> Pre-Injection, <i>mean</i>=0.348, <i>median</i>=0.366<br/> Post-Injection, <i>mean</i>=0.323, <i>median</i>=0.325<br/> <math>Z=0.779</math>, <math>p=0.218</math></p> <p><b>Rank 3</b><br/> Pre-Injection, <i>mean</i>=0.343, <i>median</i>=0.331<br/> Post-Injection, <i>mean</i>=0.358, <i>median</i>=0.395<br/> <math>Z=-0.621</math>, <math>p=0.733</math></p> <p><b>Rank 4</b><br/> Pre-Injection, <i>mean</i>=0.320, <i>median</i>=0.312</p>                                                                                                                                                                                                                                                                                                                                                                                                                                                                                |

|                                                                                                         |                                                                                                                                                                                                                             |                                            |                                                                                                                                                                                                                                                                                                                                                                                                                                                                                                                                                                                                                                                                                                                                                                                                                                                                                                                                                                                                                                                                                             |
|---------------------------------------------------------------------------------------------------------|-----------------------------------------------------------------------------------------------------------------------------------------------------------------------------------------------------------------------------|--------------------------------------------|---------------------------------------------------------------------------------------------------------------------------------------------------------------------------------------------------------------------------------------------------------------------------------------------------------------------------------------------------------------------------------------------------------------------------------------------------------------------------------------------------------------------------------------------------------------------------------------------------------------------------------------------------------------------------------------------------------------------------------------------------------------------------------------------------------------------------------------------------------------------------------------------------------------------------------------------------------------------------------------------------------------------------------------------------------------------------------------------|
|                                                                                                         |                                                                                                                                                                                                                             |                                            | <p>Post-Injection, <i>mean</i>=0.341, <i>median</i>=0.357<br/> <math>Z=-0.349</math>, <math>p=0.364</math></p> <p><b>Rank 5</b><br/> Pre-Injection, <i>mean</i>=0.299, <i>median</i>=0.298<br/> Post-Injection, <i>mean</i>=0.350, <i>median</i>=0.358<br/> <math>Z=-1.34</math>, <math>p=0.09</math></p> <p><b>Rank 6</b><br/> Pre-Injection, <i>mean</i>=0.284, <i>median</i>=0.280<br/> Post-Injection, <i>mean</i>=0.341, <i>median</i>=0.323<br/> <math>Z=-1.01</math>, <math>p=0.156</math></p> <p><b>Rank 7</b><br/> Pre-Injection, <i>mean</i>=0.242, <i>median</i>=0.249<br/> Post-Injection, <i>mean</i>=0.273, <i>median</i>=0.290<br/> <math>Z=-0.711</math>, <math>p=0.238</math></p> <p><b>Rank 8</b><br/> Pre-Injection, <i>mean</i>=0.229, <i>median</i>=0.244<br/> Post-Injection, <i>mean</i>=0.268, <i>median</i>=0.301<br/> <math>Z=-1.318</math>, <math>p=0.094</math></p> <p><b>Rank 9</b><br/> Pre-Injection, <i>mean</i>=0.211, <i>median</i>=0.223<br/> Post-Injection, <i>mean</i>=0.299, <i>median</i>=0.321<br/> <math>Z=-2.30</math>, <math>p=0.011</math></p> |
| <p><b>Extended Data 6i,j,k,l</b><br/> Change in FR for narrow and broad spiking neurons ketamine-WM</p> | <p>NHP T 8<br/> Narrow, <math>n=3</math> (arrays per session containing selective neurons)<br/> Broad, <math>n=9</math></p> <p>NHP B 9<br/> Narrow, <math>n=10</math> (arrays per session containing selective neurons)</p> | <p>Wilcoxon signed-ranks test, 1-sided</p> | <p><b>NHP T, Narrow: Preferred Location,</b><br/> Pre-Injection, <i>mean</i>=0.65, <i>median</i>=0.85<br/> Post-Injection, <i>mean</i>=0.09, <i>median</i>=0.12<br/> <math>p=0.200</math></p> <p><b>Least-Preferred Location,</b><br/> Pre-Injection, <i>mean</i>=0.05, <i>median</i>=0.04<br/> Post-Injection, <i>mean</i>=0.19, <i>median</i>=0.11<br/> <math>p=0.900</math></p> <p><b>NHP T, Broad: Preferred Location,</b></p>                                                                                                                                                                                                                                                                                                                                                                                                                                                                                                                                                                                                                                                          |



|                                                        |                      |                                             |                                                                                                                                                                                                                                                                                                                                                                                                                                                                                                                                                                                                                                                                                                                                                                                                                                                                                                                                                                                                                                                                                                                                                                                                                                                                                |
|--------------------------------------------------------|----------------------|---------------------------------------------|--------------------------------------------------------------------------------------------------------------------------------------------------------------------------------------------------------------------------------------------------------------------------------------------------------------------------------------------------------------------------------------------------------------------------------------------------------------------------------------------------------------------------------------------------------------------------------------------------------------------------------------------------------------------------------------------------------------------------------------------------------------------------------------------------------------------------------------------------------------------------------------------------------------------------------------------------------------------------------------------------------------------------------------------------------------------------------------------------------------------------------------------------------------------------------------------------------------------------------------------------------------------------------|
|                                                        | Broad, $n=18$        |                                             | <p>Pre-Injection, <math>mean=0.40</math>, <math>median=0.47</math><br/> Post-Injection, <math>mean=0.38</math>, <math>median=0.39</math></p> <p><math>p=0.697</math></p> <p><b>Least-Preferred Location,</b><br/> Pre-Injection, <math>mean=0.20</math>, <math>median=0.22</math><br/> Post-Injection, <math>mean=0.34</math>, <math>median=0.33</math></p> <p><math>p=0.081</math></p> <p><b>NHP B, Narrow:<br/> Preferred Location,</b><br/> Pre-Injection, <math>mean=0.55</math>, <math>median=0.59</math><br/> Post-Injection, <math>mean=0.36</math>, <math>median=0.36</math></p> <p><math>p=0.039</math></p> <p><b>Least-Preferred Location,</b><br/> Pre-Injection, <math>mean=0.26</math>, <math>median=0.22</math><br/> Post-Injection, <math>mean=0.31</math>, <math>median=0.33</math></p> <p><math>p=0.552</math></p> <p><b>NHP B, Broad:<br/> Preferred Location,</b><br/> Pre-Injection, <math>mean=0.46</math>, <math>median=0.43</math><br/> Post-Injection, <math>mean=0.45</math>, <math>median=0.44</math></p> <p><math>p=0.654</math></p> <p><b>Least-Preferred Location,</b><br/> Pre-Injection, <math>mean=0.26</math>, <math>median=0.26</math><br/> Post-Injection, <math>mean=0.35</math>, <math>median=0.36</math></p> <p><math>p=0.003</math></p> |
| <b>Extended Data 7a, c</b><br>Theoretical decoding for | Broad<br>17 sessions | Kruskal-Wallis one-way analysis of variance | <b>Broad:</b><br>Pre-Injection, $mean=81.5$ , $median=84.7$<br>Post-Injection, $mean=67.9$ , $median=66.4$                                                                                                                                                                                                                                                                                                                                                                                                                                                                                                                                                                                                                                                                                                                                                                                                                                                                                                                                                                                                                                                                                                                                                                     |

|                                                                                                                         |                                                                         |                                                                   |                                                                                                                                                                                                                                                                                                                                                                                                                                                                                                                 |
|-------------------------------------------------------------------------------------------------------------------------|-------------------------------------------------------------------------|-------------------------------------------------------------------|-----------------------------------------------------------------------------------------------------------------------------------------------------------------------------------------------------------------------------------------------------------------------------------------------------------------------------------------------------------------------------------------------------------------------------------------------------------------------------------------------------------------|
| broad and narrow spiking neurons compared between injection periods                                                     | Narrow<br>12 sessions                                                   |                                                                   | <p><math>H=13.71, p=0.0002, df=1,32</math></p> <p><b>Narrow:</b><br/>Pre-Injection, <math>mean=79.7, median=77.8</math><br/>Post-Injection, <math>mean=69.1, median=66.1</math></p> <p><math>H=5.07, p=0.024, df=1,22</math></p>                                                                                                                                                                                                                                                                                |
| <b>Extended Data 7b, d</b><br>Population signal for broad and narrow spiking neurons compared between injection periods | Broad<br>17 sessions<br><br>Narrow<br>12 sessions                       | Kruskal-Wallis one-way analysis of variance                       | <p><b>Broad:</b><br/>Pre-Injection, <math>mean=5.13, median=5.36</math><br/>Post-Injection, <math>mean=3.16, median=2.79</math></p> <p><math>H=7.5, p=0.006, df=1,32</math></p> <p><b>Narrow:</b><br/>Pre-Injection, <math>mean=4.89, median=4.04</math><br/>Post-Injection, <math>mean=3.05, median=2.82</math></p> <p><math>H=1.33, p=0.248, df=1,22</math></p>                                                                                                                                               |
| <b>Extended Data 9c</b><br>Decoding accuracy compared to chance (25%)                                                   | Cue<br>11<br><br>Delay<br>7                                             | One sample t-test, 2-tailed                                       | <p><b>Cue:</b><br/><math>mean=31.7, CI=24.3, 39.0, median=30.0</math><br/><math>T=1.72, p=0.117, df=10</math></p> <p><b>Delay:</b><br/><math>mean=23.3, CI=17.6, 32.6, median=22.4</math><br/><math>T=-0.48, p=0.646, df=6</math></p>                                                                                                                                                                                                                                                                           |
| <b>Extended Data 10a-f</b><br>Eyes on screen time compared between injection periods                                    | Ketamine-WM<br>18<br><br>Saline-WM<br>7<br><br>Ketamine-Perception<br>4 | Kruskal-Wallis one-way analysis of variance with post hoc testing | <p><b>Ketamine-WM</b></p> <p><b>Cue:</b><br/>Pre-Injection, <math>mean=1382.60, median=1388.31</math><br/>Early Post-Injection, <math>mean=1434.18, median=1439.26</math><br/>Late Post-Injection, <math>mean=1412.15, median=1411.39</math></p> <p><math>H=14.16, p=0.0008, df=2,51</math></p> <p>Post Hoc<br/>Pre-Injection, Early Post-Injection, <math>p=0.0005</math><br/>Pre-Injection, Late Post-Injection, <math>p=0.180</math><br/>Early Post-Injection, Late Post-Injection, <math>p=0.114</math></p> |

**Delay:**

Pre-Injection, *mean*=866.65, *median*=890.28  
Early Post-Injection, *mean*=939.50, *median*=946.17  
Late Post-Injection, *mean*=901.11, *median*=938.40

$H=11.15, p=0.004, df=2,51$

**Post Hoc**

Pre-Injection, Early Post-Injection,  $p=0.003$   
Pre-Injection, Late Post-Injection,  $p=0.176$   
Early Post-Injection, Late Post-Injection,  $p=0.264$

**Saline-WM****Cue:**

Pre-Injection, *mean*=1399.29, *median*=1407.69  
Early Post-Injection, *mean*=1386.25, *median*=1377.65  
Late Post-Injection, *mean*=1383.77, *median*=1380.16

$H=0.27, p=0.872, df=2,18$

**Delay:**

Pre-Injection, *mean*=875.11, *median*=863.25  
Early Post-Injection, *mean*=873.23, *median*=839.04  
Late Post-Injection, *mean*=890.06, *median*=892.58

$H=0.14, p=0.932, df=2,18$

**Ketamine-Perception****Cue:**

Pre-Injection, *mean*=1397.99, *median*=1397.98  
Early Post-Injection, *mean*=1448.03, *median*=1447.44  
Late Post-Injection, *mean*=1436.54, *median*=1443.50

$H=3.85, p=0.146, df=2,9$

**Delay:**

Pre-Injection, *mean*=879.42, *median*=896.63  
Early Post-Injection, *mean*=954.42, *median*=953.70  
Late Post-Injection, *mean*=942.55, *median*=945.68

$H=1.5, p=0.472, df=2,9$

|                                                                                                                  |                                                                                                                                                                                   |                                                    |                                                                                                                                                                                                                                                                                                                                                                                                                                                                                                                                                                                                                                                                                                                                                                                                                                                                                                                                                                                                                                                                                                                                                                                                                                                                                                                                                                                                                                                                                                                                             |
|------------------------------------------------------------------------------------------------------------------|-----------------------------------------------------------------------------------------------------------------------------------------------------------------------------------|----------------------------------------------------|---------------------------------------------------------------------------------------------------------------------------------------------------------------------------------------------------------------------------------------------------------------------------------------------------------------------------------------------------------------------------------------------------------------------------------------------------------------------------------------------------------------------------------------------------------------------------------------------------------------------------------------------------------------------------------------------------------------------------------------------------------------------------------------------------------------------------------------------------------------------------------------------------------------------------------------------------------------------------------------------------------------------------------------------------------------------------------------------------------------------------------------------------------------------------------------------------------------------------------------------------------------------------------------------------------------------------------------------------------------------------------------------------------------------------------------------------------------------------------------------------------------------------------------------|
| <p><b>Extended Data 10g-1</b><br/>Percent of fixations on target location compared between injection periods</p> | <p>Ketamine-WM<br/>18<br/><i>n</i>=9 target locations</p> <p>Saline-WM<br/>7<br/><i>n</i>=9 target locations</p> <p>Ketamine-Perception<br/>4<br/><i>n</i>=9 target locations</p> | <p>Kruskal-Wallis one-way analysis of variance</p> | <p><b>Ketamine-WM</b><br/><b>Cue:</b><br/>Pre-Injection, <i>mean</i>=22.5, <i>median</i>=24.2<br/>Early Post-Injection, <i>mean</i>=26.9, <i>median</i>=24.6<br/>Late Post-Injection, <i>mean</i>=24.0, <i>median</i>=24.9</p> <p><i>H</i>=0.84, <i>p</i>=0.658, <i>df</i>=2,24</p> <p><b>Delay:</b><br/>Pre-Injection, <i>mean</i>=26.9, <i>median</i>=26.2<br/>Early Post-Injection, <i>mean</i>=24.9, <i>median</i>=20.8<br/>Late Post-Injection, <i>mean</i>=28.2, <i>median</i>=26.5</p> <p><i>H</i>=1.03, <i>p</i>=0.598, <i>df</i>=2,24</p> <p><b>Saline-WM</b><br/><b>Cue:</b><br/>Pre-Injection, <i>mean</i>=21.5, <i>median</i>=22.9<br/>Early Post-Injection, <i>mean</i>=20.0, <i>median</i>=21.1<br/>Late Post-Injection, <i>mean</i>=23.0, <i>median</i>=25.2</p> <p><i>H</i>=0.79, <i>p</i>=0.673, <i>df</i>=2,24</p> <p><b>Delay:</b><br/>Pre-Injection, <i>mean</i>=22.0, <i>median</i>=22.5<br/>Early Post-Injection, <i>mean</i>=27.2, <i>median</i>=27.6<br/>Late Post-Injection, <i>mean</i>=35.4, <i>median</i>=36.1</p> <p><i>H</i>=3.65, <i>p</i>=0.161, <i>df</i>=2,24</p> <p><b>Ketamine-Perception</b><br/><b>Cue:</b><br/>Pre-Injection, <i>mean</i>=28.9, <i>median</i>=30.0<br/>Early Post-Injection, <i>mean</i>=22.6, <i>median</i>=21.7<br/>Late Post-Injection, <i>mean</i>=23.1, <i>median</i>=26.9</p> <p><i>H</i>=1.03, <i>p</i>=0.599, <i>df</i>=2,24</p> <p><b>Delay:</b><br/>Pre-Injection, <i>mean</i>=21.7, <i>median</i>=17.3<br/>Early Post-Injection, <i>mean</i>=21.9, <i>median</i>=22.0</p> |
|------------------------------------------------------------------------------------------------------------------|-----------------------------------------------------------------------------------------------------------------------------------------------------------------------------------|----------------------------------------------------|---------------------------------------------------------------------------------------------------------------------------------------------------------------------------------------------------------------------------------------------------------------------------------------------------------------------------------------------------------------------------------------------------------------------------------------------------------------------------------------------------------------------------------------------------------------------------------------------------------------------------------------------------------------------------------------------------------------------------------------------------------------------------------------------------------------------------------------------------------------------------------------------------------------------------------------------------------------------------------------------------------------------------------------------------------------------------------------------------------------------------------------------------------------------------------------------------------------------------------------------------------------------------------------------------------------------------------------------------------------------------------------------------------------------------------------------------------------------------------------------------------------------------------------------|

|  |  |  |                                                                                                                |
|--|--|--|----------------------------------------------------------------------------------------------------------------|
|  |  |  | Late Post-Injection, <i>mean</i> =20.6, <i>median</i> =20.3<br><i>H</i> =0.7, <i>p</i> =0.704, <i>df</i> =2,24 |
|--|--|--|----------------------------------------------------------------------------------------------------------------|
